# Supplementary material
Source: PubMed Central journal article supplement (PMC3010379)

## Synthesis of Macrocyclic Tetrazoles for Rapid Photoinduced Bioorthogonal 1,3-Dipolar Cycloaddition Reactions

Zhipeng Yu, Reyna K. V. Lim, and Qing Lin\*

*Department of Chemistry, State University of New York at Buffalo**Buffalo, New York 14260-3000*

### General Information

All photo reactions were carried out under the ambient condition using oven-dried quartz test tubes with magnetic stirrers. Solvents and chemicals were purchased from commercial sources and used directly without further purification. Flash chromatography was performed with SiliCycle P60 silica gel (40-63  $\mu\text{m}$ , 60Å).  $^1\text{H}$  NMR spectra were recorded with Inova-300, -400 or -500 MHz spectrometers, and chemical shifts were reported in ppm using either TMS or deuterated solvents as internal standards (TMS, 0.00;  $\text{CDCl}_3$ , 7.26;  $\text{C}_6\text{D}_6$ , 7.15;  $\text{DMSO}-d_6$ , 2.50). Multiplicity was reported as follows: s = singlet, d = doublet, t = triplet, q = quartet, m = multiplet, b = broad.  $^{13}\text{C}$  NMR spectra were recorded at 75.4 MHz, and chemical shifts were reported in ppm using the deuterated solvents as internal standards ( $\text{CDCl}_3$ , 77.0;  $\text{DMSO}-d_6$ , 39.5;  $\text{C}_6\text{D}_6$ , 128.0).

### Experimental Procedures and Characterization Data

#### Synthesis of 2,5-bis(*o*-phenolyl)tetrazole (**1**):

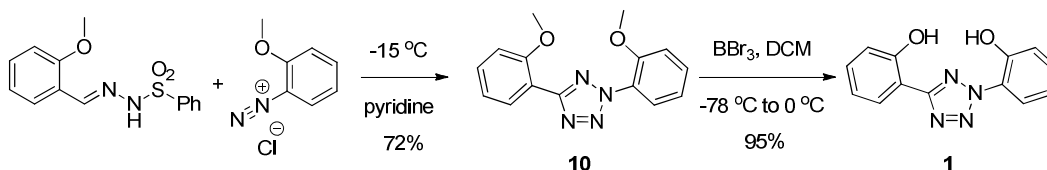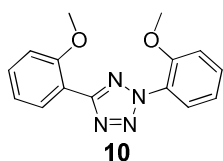

**2,5-bis(2-methoxyphenyl)-2H-tetrazole (10):** Tetrazole **10** was synthesized

according to the published procedure<sup>1</sup>:  $^1\text{H}$  NMR (500 MHz,  $\text{CDCl}_3$ )  $\delta$  8.05 (dd,  $J$  = 7.5, 2.0 Hz, 1H), 7.61 (dd,  $J$  = 7.5, 1.5 Hz, 1H), 7.54-7.50 (m, 1H), 7.49- 7.45 (m, 1H), 7.13-7.06 (m, 4H), 3.96 (s, 3H), 3.87 (s, 3H);  $^{13}\text{C}$  NMR (75 MHz,

$\text{CDCl}_3$ )  $\delta$  163.0, 157.6, 153.7, 131.9, 131.6, 131.0, 127.2, 126.5, 120.7, 120.6, 116.4, 112.7, 111.8, 56.2, 56.1.

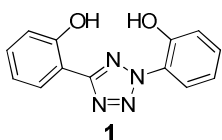

A solution of tetrazole **10** (0.846 g, 3 mmol) in 15 mL dichloromethane was cooled to -78 °C with stirring, then added 15 mL  $\text{BBr}_3$  solution in DCM (1 M, 15 mmol). The mixture was warmed up to room temperature over 3 h before quenching with

20 mL water under cooling. The solution was basified with 2 N NaOH to pH 10 for 10 min, and then brought back to pH 5 with 2 N HCl. The solution was extracted with DCM (20 mL  $\times$  3), and the organic layers were separated, dried over sodium sulfate and concentrated under reduced pressure. The residue was purified by flash chromatography on a silica gel column using a stepwise gradient of 2-15 % ethyl acetate/hexanes to afford the desired product as a crystalline needle (0.724 g, 95% yield):  $^1\text{H-NMR}$  ( $\text{CDCl}_3$ , 500 MHz)  $\delta$  9.67 (b, 1H), 9.53 (b, 1H), 8.23 (d,  $J = 8.0$  Hz, 1H), 8.09 (dd,  $J = 8.0$ , 1.5 Hz, 1H), 7.47-7.42 (m, 2H), 7.25 (d,  $J = 8.0$  Hz, 1H), 7.16-7.04 (m, 3H);  $^{13}\text{C-NMR}$  ( $\text{CDCl}_3$ , 75 MHz)  $\delta$  162.9, 156.8, 148.4, 133.0, 131.6, 127.5, 122.4, 120.7, 120.6, 120.2, 119.3, 117.9, 110.0; MS (ESI) calcd for  $\text{C}_{13}\text{H}_{11}\text{N}_4\text{O}_2$  255.3  $[\text{M}+\text{H}^+]$ , found 255.3.

### Synthesis of 2-*o*-phenolyl-5-*o*-anilinyltetrazole (7):

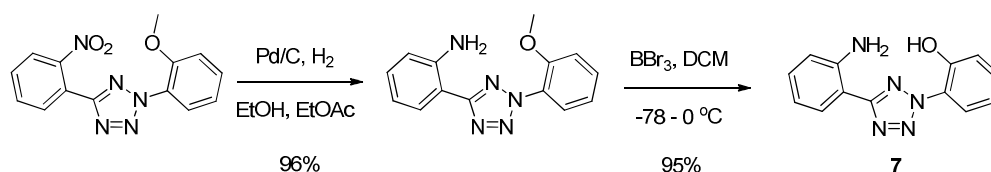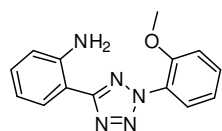

A suspension of 2-*o*-methoxyphenyl-5-*o*-nitrophenyltetrazole<sup>1</sup> (3.00 g, 10.1 mmol) and palladium on carbon (50% wet, 10% weight, 300 mg) in 200 mL EtOAc/ EtOH (1:1) was flushed with 1 atm hydrogen gas for 8 h under vigorous stirring. After the reaction was completed as monitored by TLC, the solid was removed via filtration through a thin layer of silica gel and the solvent was evaporated to get the desired compound as a white solid (2.586 g, 96% yield):  $^1\text{H-NMR}$  ( $\text{CDCl}_3$ , 500 MHz)  $\delta$  8.22 (dd,  $J = 8.0$ , 1.5 Hz, 1H), 7.60 (dd,  $J = 7.5$ , 1.5 Hz, 1H), 7.57-7.53 (m, 1H), 7.28-7.24 (m, 1H), 7.16-7.12 (m, 2H), 6.85-6.81 (m, 2H), 5.51 (b, 2H), 3.88 (s, 3H); MS (ESI) calcd for  $\text{C}_{14}\text{H}_{14}\text{N}_5\text{O}$  268.1  $[\text{M}+\text{H}^+]$ , found 268.1.

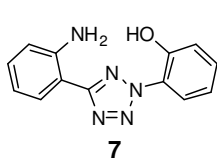

A solution of 2-*o*-methoxyphenyl-5-*o*-anilinyltetrazole (1.6 g, 6 mmol) in 15 mL DCM was cooled to  $-78$  °C with stirring, then added 32 mL  $\text{BBr}_3$  solution in DCM (1 M, 32 mmol). The mixture was warmed up to room temperature over 3 h before quenching by adding 30 mL water under cooling. The solution was basified with 2 N NaOH to pH 10 for 10 min before brought back to pH 5 with 2 N HCl. The solution was extracted with DCM (50 mL  $\times$  3). The organic layers were separated, dried over sodium sulfate, and concentrated under reduced pressure. The residue was purified by flash chromatography on a silica gel column using a stepwise gradient of 2-10 % ethyl acetate/hexanes to afford the desired product as a crystalline needle (1.443 g, 95% yield):  $^1\text{H-NMR}$  ( $\text{CDCl}_3$ , 500 MHz)  $\delta$  9.70 (b, 1H), 8.22 (dd,  $J = 8.5$ , 1.5 Hz, 1H), 8.12 (dd,  $J = 8.0$ , 1.5 Hz, 1H), 7.42-7.38 (m, 1H), 7.31-7.28 (m, 1H), 7.24 (dd,  $J = 8.5$ , 1.0 Hz, 1H), 7.11-7.08 (m, 1H), 6.88-6.83 (m, 2H), 5.55 (b, 2H);  $^{13}\text{C-NMR}$  ( $\text{CDCl}_3$ , 75 MHz)  $\delta$  163.8,

148.3, 146.2, 131.9, 131.0, 128.9, 122.7, 120.5, 119.1, 117.5, 116.8, 108.5; MS (ESI) calcd for  $C_{13}H_{12}N_5O$  254.1  $[M+H^+]$ , found 254.1.

**Procedure for the screening of alkali metal bases for macrocyclic ring closure:**

A solution of 2,5-bis(*o*-phenolyl)tetrazole (**1**, 5.0 mg) and 1.1 equiv of dibromoalkane in 5.0 mL acetone was refluxed with stirring overnight in the presence of 3 equiv of different alkali metal bases. Afterwards, the solvent was removed under reduced pressure to give the crude product which was subsequently purified via silica gel flash chromatography.

**General procedure for the synthesis of macrocyclic tetrazoles using specific alkali metal base:**

A solution of 2,5-bis(*o*-phenolyl)tetrazole (**1**, 1.0 mmol) and 1.1 equiv of dibromoalkane in 200 mL acetone was refluxed with stirring overnight in the presence of 3 equiv of the indicated alkali metal base. The mixture was filtrated through Celite and the solvent was removed under reduced pressure to give the crude product, which was subsequently purified via silica gel flash chromatography.

**General procedure for the photoactivated 1,3-dipolar cycloaddition:**

A solution containing 0.1 mmol tetrazole and 10 mmol alkene dipolarophile in 250 mL EtOAc was irradiated with a hand-held 302-nm UV lamp (UVP; UVM-57, 302 nm, 115V, 0.16 AMPS). The solvent and excess reagents were removed under reduced pressure to give the crude product, which was subsequently purified by silica gel flash chromatography.

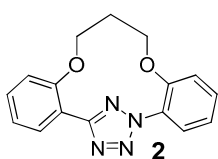

**1,3-Propane-linked-2,5-bis(*o*-phenolyl)-2*H*-tetrazole (**2**)**

$^1H$ -NMR (500 MHz,  $CDCl_3$ )  $\delta$  8.26 (dd,  $J = 7.5, 1.5$  Hz, 1H), 7.98 (dd,  $J = 8.0, 1.5$  Hz, 1H), 7.53 (td,  $J = 8.5, 1.5$  Hz, 1H), 7.48 (td,  $J = 8.0, 2.0$  Hz, 1H), 7.39-7.26 (m, 4H), 4.49 (t,  $J = 5.0$ , 2H), 3.85 (t,  $J = 5.0$  Hz, 2H), 2.18 (quint,  $J = 5.0$  Hz, 2H);  $^{13}C$ -NMR (75 MHz,  $CDCl_3$ )  $\delta$  161.6, 157.6, 152.2, 131.7, 131.3, 131.0, 129.3, 124.7, 124.7, 123.9, 123.9, 120.9, 71.7, 69.4, 31.2; HRMS (ESI) calcd for  $C_{16}H_{15}N_4O_2$  295.1195  $[M + H^+]$ , found 295.1190.

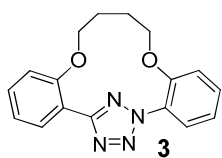

**1,4-Butane-linked-2,5-bis(*o*-phenolyl)-2*H*-tetrazole (**3**)**

$^1H$ -NMR (500 MHz,  $CDCl_3$ )  $\delta$  8.07 (dd,  $J = 7.5, 1.5$  Hz, 1H), 7.86 (dd,  $J = 8.0, 1.5$  Hz, 1H), 7.50-7.43 (m, 2H), 7.19-7.16 (m, 2H), 7.12 (d,  $J = 8.0$  Hz, 1H), 7.07 (d,  $J = 8.5$  Hz, 1H), 4.17 (t,  $J = 5.5$  Hz, 2H), 4.04 (t,  $J = 5.5$  Hz, 2H), 1.99-1.92 (m,

4H);  $^{13}\text{C}$ -NMR (75 MHz,  $\text{CDCl}_3$ )  $\delta$  161.8, 157.7, 152.8, 131.4, 131.4, 129.6, 128.0, 124.9, 121.8, 121.6, 118.7, 117.1, 116.7, 71.9, 70.9, 26.1, 25.5; HRMS (ESI) calcd for  $\text{C}_{17}\text{H}_{17}\text{N}_4\text{O}_2$  309.1352 [ $\text{M} + \text{H}^+$ ], found 309.1346.

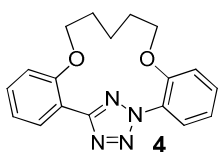

**1,5-Pentane-linked-2,5-bis(*o*-phenolyl)-2*H*-tetrazole (4)**

$^1\text{H}$ -NMR (500 MHz,  $\text{CDCl}_3$ )  $\delta$  8.10 (dd,  $J = 7.5, 1.5$  Hz, 1H), 7.71 (dd,  $J = 8.0, 1.5$  Hz, 1H), 7.51-7.43 (m, 2H), 7.17-7.10 (m, 3H), 7.04 (d,  $J = 8.5$  Hz, 1H), 4.19 (t,  $J = 5.5$  Hz, 2H), 4.12 (t,  $J = 5.5$  Hz, 2H), 1.88-1.77 (m, 6H);  $^{13}\text{C}$ -NMR (75 MHz,  $\text{CDCl}_3$ )  $\delta$  162.5, 157.1, 152.5, 131.4, 131.3, 130.1, 127.1, 126.3, 120.7, 120.6, 117.2, 114.4, 113.5, 68.4, 67.3, 27.8, 27.7, 20.5; HRMS (ESI) calcd for  $\text{C}_{18}\text{H}_{19}\text{N}_4\text{O}_2$  323.1508 [ $\text{M} + \text{H}^+$ ], found 323.1503.

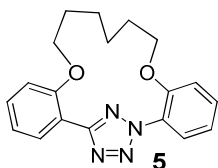

**1,6-Hexane-linked-2,5-bis(*o*-phenolyl)-2*H*-tetrazole (5)**

$^1\text{H}$ -NMR (500 MHz,  $\text{CDCl}_3$ )  $\delta$  8.03 (dd,  $J = 7.5, 1.5$  Hz, 1H), 7.56 (dd,  $J = 8.0, 1.5$  Hz, 1H), 7.52 (td,  $J = 7.8, 1.5$  Hz, 1H), 7.48 (td,  $J = 7.8, 1.5$  Hz, 1H), 7.12-7.07 (m, 4H), 4.15 (t,  $J = 5.0$  Hz, 2H), 4.12 (t,  $J = 5.5$  Hz, 2H), 1.79-1.72 (m, 4H), 1.65-1.59 (m, 4H);  $^{13}\text{C}$ -NMR (75 MHz,  $\text{CDCl}_3$ )  $\delta$  162.9, 157.2, 153.3, 131.9, 131.4, 130.8, 127.6, 126.5, 120.7, 120.2, 117.3, 113.4, 113.2, 70.3, 69.8, 28.6, 28.1, 27.3, 26.7; HRMS (ESI) calcd for  $\text{C}_{19}\text{H}_{21}\text{N}_4\text{O}_2$  337.1665 [ $\text{M} + \text{H}^+$ ], found 337.1659.

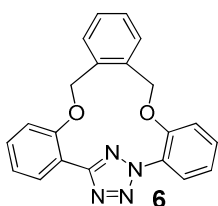

***o*-Xylylene-linked-2,5-bis(*o*-phenolyl)-2*H*-tetrazole (6)**

$^1\text{H}$ -NMR (500 MHz,  $\text{CDCl}_3$ )  $\delta$  8.16 (dd,  $J = 7.6, 1.6$  Hz, 1H), 8.02 (dd,  $J = 8.0, 1.6$  Hz, 1H), 7.63-7.54 (m, 5H), 7.47-7.44 (m, 3H), 7.38-7.27 (m, 2H), 5.45 (s, 2H), 5.24 (s, 2H);  $^{13}\text{C}$  NMR (75 MHz,  $\text{CDCl}_3$ )  $\delta$  162.2, 157.2, 151.5, 136.0, 135.3, 132.4, 132.2, 131.7, 131.4, 130.6, 130.4, 129.9, 129.3, 129.1, 124.5, 124.4, 124.2, 124.0, 122.3, 121.0, 75.5, 73.7; HRMS (ESI) calcd for  $\text{C}_{21}\text{H}_{17}\text{N}_4\text{O}_2$  357.1346 [ $\text{M} + \text{H}^+$ ], found 357.1359.

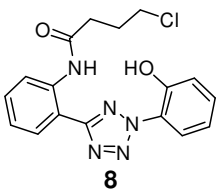

**4-Chloro-*N*-(2-(2-(2-hydroxyphenyl)-2*H*-tetrazol-5-yl)phenyl)butanamide (8):**

A mixture of 150 mL saturated  $\text{NaHCO}_3$  solution and 2-*o*-methoxyphenyl -5-*o*-anilinyntetrazole (7) (0.6 g, 2.37 mmol) in 50 mL EtOAc with vigorously stirred at room temperature. To this solution was added a solution of 4-chloro- butanoyl chloride (274.6  $\mu\text{L}$ , 2.84 mmol) in 10 mL EtOAc dropwise, and the stirring was continued for additional 2 hours. The mixture was then extracted with EtOAc (50 mL  $\times$  3). The organic layers were separated, dried over sodium sulfate, and concentrated under the reduced pressure. The

residue was purified by flash chromatography on a silica gel column using a stepwise gradient of 8-10 % ethyl acetate/hexanes to afford the desired product as a light-yellow solid, which was further purified via recrystallization to give the pure product as a white powder (550 mg, 65% yield):  $^1\text{H-NMR}$  ( $\text{CDCl}_3$ , 500 MHz)  $\delta$  10.69 (b, 1H), 9.50 (b, 1H), 8.69 (d,  $J = 8.5$  Hz, 1H), 8.24-8.20 (m, 2H), 7.52 (t,  $J = 7.5$  Hz, 1H), 7.44 (t,  $J = 7.5$  Hz, 1H), 7.26-7.22 (m, 2H), 7.12 (t,  $J = 7.5$  Hz, 1H), 3.70 (t,  $J = 6.0$  Hz, 2H), 2.75 (t,  $J = 7.0$  Hz, 2H), 2.28 (quint,  $J = 6.5$  Hz 2H);  $^{13}\text{C-NMR}$  ( $\text{CDCl}_3$ , 75 MHz)  $\delta$  170.5, 163.0, 148.4, 137.5, 132.1, 131.6, 128.5, 123.7, 122.4, 121.3, 120.7, 120.6, 119.4, 113.0, 44.3, 35.0, 27.9; MS (ESI) calcd for  $\text{C}_{17}\text{H}_{17}\text{ClN}_5\text{O}_2$  358.1 [ $\text{M} + \text{H}^+$ ], found 358.1.

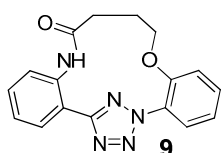

**1,3-Propane-linked-2-(*o*-oxophenyl)-5-(*o*-*N*-formamidophenyl)-2H-**

**tetrazole (9):**  $^1\text{H-NMR}$  (300 MHz,  $\text{DMSO-}d_6$ )  $\delta$  10.59 (s, 1H), 8.15 (dd,  $J = 7.8$ , 1.8 Hz, 1H), 7.64-7.46 (m, 5H), 7.17 (d,  $J = 7.2$  Hz, 1H), 7.5 (td,  $J = 7.5$ , 1.2 Hz, 1H), 3.76 (t,  $J = 6.9$  Hz, 2H), 2.31 (t,  $J = 7.5$  Hz, 2H), 2.17-2.07 (m, 2H);  $^{13}\text{C-NMR}$

(75 MHz,  $\text{DMSO-}d_6$ )  $\delta$  174.5, 162.7, 152.2, 137.8, 132.6, 131.8, 130.0, 129.6, 128.5, 127.1, 125.3, 124.8, 119.8, 117.9, 50.6, 31.3, 19.0; HRMS (ESI) calcd for  $\text{C}_{17}\text{H}_{16}\text{N}_5\text{O}_2$  322.1299 [ $\text{M} + \text{H}^+$ ], found 322.1300.

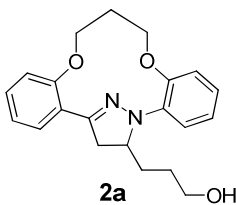

**1,3-Propane-linked-3-(1,3-bis(2-oxophenyl)-4,5-dihydro-1H-pyrazol-5-yl)propan-1-ol (2a):**

$^1\text{H-NMR}$  (500 MHz,  $\text{CDCl}_3$ )  $\delta$  7.28-7.22 (m, 2H), 7.17-7.12 (m, 3H), 7.05-7.02 (m, 1H), 6.97-6.94 (m, 2H), 4.36-4.29 (m, 2H), 4.28-4.25 (m, 1H), 4.19-4.15 (m, 1H), 3.95-3.91 (m, 1H), 3.61 (t,  $J = 6.5$  Hz, 2H), 3.37 (dd,  $J =$

16.0, 11.0 Hz, 1H), 2.94 (dd,  $J = 16.0$ , 8.5 Hz, 1H), 2.19-2.15 (m, 2H), 1.90-1.84 (m, 1H), 1.71-1.54 (m, 4H);  $^{13}\text{C-NMR}$  (75 MHz,  $\text{CDCl}_3$ )  $\delta$  156.8, 151.5, 144.2, 137.3, 128.9, 128.3, 126.6, 124.0, 124.0, 123.8, 123.8, 122.7, 119.9, 70.7, 69.1, 62.5, 61.6, 38.9, 31.4, 28.6, 28.4; HRMS (ESI) calcd for  $\text{C}_{21}\text{H}_{25}\text{N}_2\text{O}_3$  353.1865 [ $\text{M} + \text{H}^+$ ], found 353.1860.

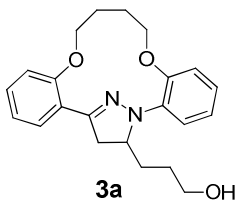

**1,4-Butane-linked-3-(1,3-bis(2-oxophenyl)-4,5-dihydro-1H-pyrazol-5-yl)propan-1-ol (3a):**

$^1\text{H-NMR}$  (400 MHz,  $\text{CDCl}_3$ )  $\delta$  7.31-7.29 (m, 1H), 7.28-7.26 (m, 1H), 7.15-7.13 (m, 1H), 7.11-7.06 (m, 1H), 7.03-6.99 (m, 2H), 6.95-6.91 (m, 2H), 4.16-4.13 (m, 3H), 4.03-3.98 (m, 1H), 3.61 (t,  $J = 6.0$  Hz, 2H), 3.54 (dd,  $J =$

16.4, 10.8 Hz, 1H), 2.79 (dd,  $J = 16.4$ , 9.6 Hz, 1H), 2.13-1.89 (m, 4H), 1.84-1.81 (m, 1H), 1.71-1.57 (m, 4H);  $^{13}\text{C-NMR}$  (75 MHz,  $\text{CDCl}_3$ )  $\delta$  157.7, 154.9, 148.9, 136.1, 129.4, 128.8, 125.8, 125.7, 125.1, 121.8, 121.2, 117.3, 116.3, 72.5, 70.4, 64.1, 62.7, 41.6, 30.2, 29.1, 26.9, 26.8; HRMS (ESI) calcd for  $\text{C}_{22}\text{H}_{27}\text{N}_2\text{O}_3$  367.2022 [ $\text{M} + \text{H}^+$ ], found 367.2016.

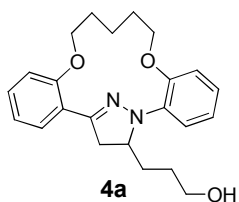

**1,5-Pentane-linked-3-(1,3-bis(2-oxophenyl)-4,5-dihydro-1H-pyrazol-5-yl)propan-1-ol (4a):**  $^1\text{H-NMR}$  (400 MHz,  $\text{CDCl}_3$ )  $\delta$  7.40 (dd,  $J = 8.0, 1.6$  Hz, 1H), 7.31-7.27 (m, 2H), 7.20 (td,  $J = 8.0, 1.6$  Hz, 1H), 6.97-6.87 (m, 4H), 4.40-4.35 (m, 1H), 4.19-4.11 (m, 1H), 4.07-3.95 (m, 2H), 3.89 (td,  $J = 8.8, 2.4$  Hz, 1H), 3.72 (dd,  $J = 16.4, 10.4$  Hz, 1H), 3.64 (t,  $J = 6.4$  Hz, 2H), 2.71 (dd,  $J = 16.4, 12.8$  Hz, 1H), 1.99-1.91 (m, 2H), 1.90-1.79 (m, 2H), 1.74-1.56 (m, 7H);  $^{13}\text{C-NMR}$  (75 MHz,  $\text{CDCl}_3$ )  $\delta$  157.6, 156.7, 151.7, 135.1, 129.6, 129.4, 129.0, 127.9, 124.7, 121.1, 119.8, 114.0, 112.2, 67.4, 66.4, 65.9, 62.8, 42.0, 30.5, 29.6, 27.0, 26.9, 21.1; HRMS (ESI) calcd for  $\text{C}_{23}\text{H}_{29}\text{N}_2\text{O}_3$  381.2178 [ $\text{M} + \text{H}^+$ ], found 381.2173.

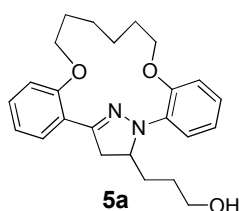

**1,6-Hexane-linked-3-(1,3-bis(2-oxophenyl)-4,5-dihydro-1H-pyrazol-5-yl)propan-1-ol (5a):**  $^1\text{H-NMR}$  (400 MHz,  $\text{CDCl}_3$ )  $\delta$  7.49 (dd,  $J = 7.6, 1.6$  Hz, 1H), 7.33 (dd,  $J = 7.6, 1.6$  Hz, 1H), 7.27 (td,  $J = 8.0, 2.0$  Hz, 1H), 7.22 (td,  $J = 8.0, 2.0$  Hz, 1H), 6.93-6.86 (m, 4H), 4.28-4.25 (m, 1H), 4.16-4.11 (m, 2H), 4.04-4.01 (m, 1H), 3.89-3.84 (m, 1H), 3.82 (dd,  $J = 16.4, 10.4$  Hz, 1H), 3.60 (t,  $J = 6.4$  Hz, 2H), 2.61 (dd,  $J = 16.4, 13.2$  Hz, 1H), 1.85-1.77 (m, 4H), 1.75-1.54 (m, 8H), 1.45-1.39 (m, 1H);  $^{13}\text{C-NMR}$  (75 MHz,  $\text{CDCl}_3$ )  $\delta$  157.6, 156.8, 151.3, 135.3, 130.9, 129.9, 129.6, 128.5, 123.7, 120.3, 120.2, 113.5, 111.4, 70.3, 68.2, 66.0, 62.8, 41.8, 30.6, 30.2, 29.7, 29.6, 27.5, 27.1; HRMS (ESI) calcd for  $\text{C}_{24}\text{H}_{31}\text{N}_2\text{O}_3$  395.2335 [ $\text{M} + \text{H}^+$ ], found 395.2329.

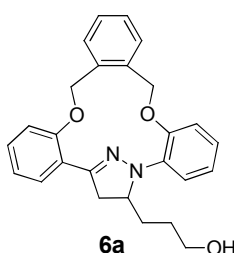

***o*-Xylylene-linked-3-(1,3-bis(2-oxophenyl)-4,5-dihydro-1H-pyrazol-5-yl)propan-1-ol (6a):**  $^1\text{H-NMR}$  (500 MHz,  $\text{CDCl}_3$ )  $\delta$  7.55 (dd,  $J = 7.0, 1.5$  Hz, 1H), 7.47 (dd,  $J = 7.0, 1.5$  Hz, 1H), 7.38-7.26 (m, 7H), 7.12-7.07 (m, 2H), 7.04-7.00 (m, 1H), 5.41 (dd,  $J = 9.5, 4.5$  Hz, 2H), 5.11 (dd,  $J = 14.5, 9.5$  Hz, 2H), 4.25-4.19 (m, 1H), 3.61 (t,  $J = 6.0$  Hz, 2H), 3.36 (dd,  $J = 16.0, 10.5$  Hz, 1H), 2.83 (dd,  $J = 16.0, 10.0$  Hz, 1H), 1.93-1.86 (m, 1H), 1.71-1.54 (m, 4H);  $^{13}\text{C-NMR}$  (75 MHz,  $\text{CDCl}_3$ )  $\delta$  156.5, 153.1, 147.0, 137.4, 136.4, 136.2, 131.6, 130.8, 129.2, 128.8, 128.5, 128.5, 126.3, 124.5, 123.1, 122.8, 122.4, 120.6, 120.5, 73.3, 72.6, 62.6, 62.4, 40.2, 29.6, 29.0; HRMS (EI) calcd for  $\text{C}_{26}\text{H}_{26}\text{N}_2\text{O}_3$  414.1943 [ $\text{M}^+$ ], found 414.1938.

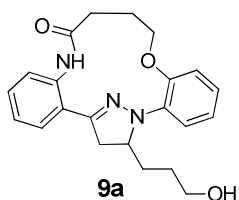

**1,3-Propane-linked-3-(1-(2-oxophenyl)-3-(2-N-formamidophenyl)-4,5-dihydro-1H-pyrazol-5-yl)propan-1-ol (9a):**  $^1\text{H-NMR}$  (500 MHz,  $\text{CDCl}_3$ )  $\delta$  11.98 (b, 1H), 8.61 (dd,  $J = 8.5, 1.0$  Hz, 1H), 7.32-7.28 (m, 1H), 7.25 (dd,  $J = 8.0, 1.5$  Hz, 1H), 7.07 (td,  $J = 7.5, 1.0$  Hz, 1H), 6.98-6.92 (m, 3H), 6.85 (dd,  $J = 8.0, 2.0$  Hz, 1H), 4.54-4.48 (m, 1H), 4.08-4.06 (m, 2H), 3.67-3.64 (m, 2H), 3.50 (dd,  $J = 16.5, 11.5$  Hz, 1H),

2.97 (dd,  $J = 16.5, 7.0$  Hz, 1H), 2.71-2.67 (m, 1H), 2.61-2.58 (m, 1H), 2.28-2.23 (m, 2H), 1.97-1.92 (m, 1H), 1.71-1.60 (m, 4H);  $^{13}\text{C}$ -NMR (75 MHz,  $\text{CDCl}_3$ )  $\delta$  172.9, 171.1, 149.6, 146.3, 137.6, 132.6, 128.7, 127.1, 122.5, 121.4, 120.4, 119.6, 116.4, 114.6, 69.4, 62.4, 60.2, 37.8, 36.4, 28.3, 28.0, 25.6; HRMS (ESI) calcd for  $\text{C}_{22}\text{H}_{26}\text{N}_3\text{O}_3$  380.1969 [ $\text{M} + \text{H}^+$ ], found 380.1972.

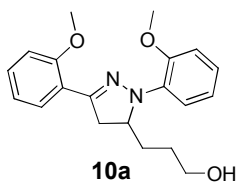

**3-(1,3-bis(2-methoxyphenyl)-4,5-dihydro-1H-pyrazol-5-yl)propan-1-ol (10a):**

$^1\text{H}$ -NMR (500 MHz,  $\text{CDCl}_3$ )  $\delta$  7.87 (dd,  $J = 7.6, 1.6$  Hz, 1H), 7.55 (dd,  $J = 8.0, 2.0$  Hz, 1H), 7.32-7.28 (m, 1H), 7.02-6.89 (m, 5H), 4.72-4.65 (m, 1H), 3.89 (s, 3H), 3.86 (s, 3H), 3.51 (t,  $J = 6.4$  Hz, 2H), 3.45 (dd,  $J = 17.2, 10.8$  Hz, 1H), 3.22 (dd,  $J = 17.2, 3.6$  Hz, 1H), 1.58 (br, 1H), 1.51-1.38 (m, 2H), 1.36-1.28 (m, 2H);  $^{13}\text{C}$ -NMR (75 MHz,  $\text{CDCl}_3$ )  $\delta$  157.5, 149.7, 148.6, 135.0, 129.6, 128.9, 122.7, 122.7, 121.3, 121.2, 120.7, 111.6, 111.4, 62.6, 62.5, 55.7, 55.4, 40.7, 28.2, 27.6; HRMS (EI) calcd for  $\text{C}_{20}\text{H}_{24}\text{N}_2\text{O}_3$  340.1787 [ $\text{M}^+$ ], found 340.1781.

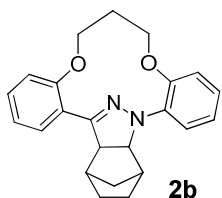

**1,3-Propane-linked-1,3-bis(2-oxophenyl)-3a,4,5,6,7,7a-hexahydro-1H-4,7-**

**methanoindazole (2b):**  $^1\text{H}$ -NMR (500 MHz,  $\text{CDCl}_3$ )  $\delta$  7.41 (dd,  $J = 8.5, 2.0$  Hz, 1H), 7.24-7.21 (m, 1H), 7.17-7.12 (m, 3H), 7.06-7.03 (m, 1H), 6.87 (dd,  $J = 8.0, 1.5$  Hz, 1H), 6.81 (td,  $J = 8.0, 1.5$  Hz, 1H), 4.32-4.27 (m, 2H), 4.23-4.20 (m, 2H), 4.00-3.96 (m, 1H), 3.52 (d,  $J = 9.5$  Hz, 1H), 2.71-2.68 (m, 1H), 2.63-2.58 (m, 1H), 2.11-2.14 (m, 2H), 1.61-1.56 (m, 3H), 1.46-1.43 (m, 1H), 1.36-1.31 (m, 1H), 1.14-1.11 (m, 1H);  $^{13}\text{C}$ -NMR (75 MHz,  $\text{CDCl}_3$ )  $\delta$  156.9, 148.3, 145.4, 136.8, 128.3, 128.1, 126.2, 124.9, 124.2, 124.2, 124.0, 120.0, 115.8, 70.4, 69.3, 67.7, 54.8, 40.9, 40.4, 33.1, 31.9, 27.8, 24.4; HRMS (EI) calcd for  $\text{C}_{23}\text{H}_{24}\text{N}_2\text{O}_2$  360.1838 [ $\text{M}^+$ ], found 360.1832.

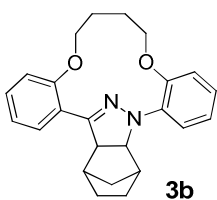

**1,4-Butane-linked-1,3-bis(2-oxophenyl)-3a,4,5,6,7,7a-hexahydro-1H-4,7-**

**methanoindazole (3b):**  $^1\text{H}$ -NMR (500 MHz,  $\text{CDCl}_3$ )  $\delta$  7.34 (d,  $J = 7.5$  Hz, 1H), 7.29-7.21 (m, 1H), 7.08-7.03 (m, 1H), 7.03-6.92 (m, 5H), 4.21-4.10 (m, 3H), 4.09-4.02 (m, 2H), 3.75-3.55 (m, 1H), 2.62-2.52 (m, 1H), 2.45-2.36 (m, 1H), 2.13-2.07 (m, 1H), 2.06-1.93 (m, 3H), 1.67 (d,  $J = 10.0$  Hz, 1H), 1.58-1.47 (m, 2H), 1.42-1.34 (m, 1H), 1.29-1.21 (m, 1H), 1.18-1.13 (m, 1H);  $^{13}\text{C}$ -NMR (75 MHz,  $\text{CDCl}_3$ )  $\delta$  157.7, 152.7, 149.6, 129.0, 128.9, 123.3, 121.8, 121.7, 121.6, 121.5, 117.8, 117.7, 116.4, 72.1, 70.8, 70.5, 57.5, 42.0, 39.8, 33.3, 28.0, 27.6, 26.5, 24.4; HRMS (EI) calcd for  $\text{C}_{24}\text{H}_{26}\text{N}_2\text{O}_2$  374.1994 [ $\text{M}^+$ ], found 374.1989.

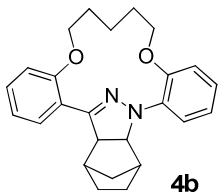

**1,5-Pentane-linked-1,3-bis(2-oxophenyl)-3a,4,5,6,7,7a-hexahydro-1H-4,7-**

**methanoindazole (4b):**  $^1\text{H-NMR}$  (500 MHz,  $\text{CDCl}_3$ )  $\delta$  7.38 (dd,  $J = 7.5, 1.5$  Hz, 1H), 7.32 (dd,  $J = 7.5, 1.5$  Hz, 1H), 7.28-7.24 (m, 1H), 7.17 (td,  $J = 8.0, 2.0$  Hz, 1H), 6.93-6.91 (m, 2H), 6.88 (td,  $J = 8.0, 1.0$  Hz, 1H), 6.84 (dd,  $J = 8.0, 1.0$  Hz, 1H), 4.42-4.38 (m, 1H), 3.97-3.89 (m, 4H), 3.84-3.82 (m, 1H), 2.40 (d,  $J = 4.0$  Hz,

1H), 2.23 (d,  $J = 3.5$  Hz, 1H), 1.92-1.84 (m, 2H), 1.82-1.72 (m, 3H), 1.71-1.66 (m, 1H), 1.53-1.42 (m, 2H), 1.32-1.25 (m, 2H), 1.22-1.20 (m, 1H), 1.14-1.09 (m, 1H);  $^{13}\text{C-NMR}$  (75 MHz,  $\text{CDCl}_3$ )  $\delta$  157.3, 156.9, 153.3, 136.1, 130.1, 129.3, 129.2, 127.6, 124.7, 121.1, 119.7, 114.1, 112.0, 73.7, 67.3, 66.8, 58.9, 43.5, 39.7, 33.4, 28.6, 27.2, 27.1, 24.2, 21.4; HRMS (EI) calcd for  $\text{C}_{25}\text{H}_{28}\text{N}_2\text{O}_2$  388.2151 [ $\text{M}^+$ ], found 388.2145.

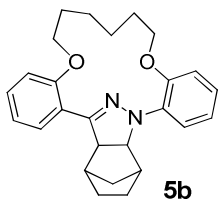

**1,5-Pentane-linked-1,3-bis(2-oxophenyl)-3a,4,5,6,7,7a-hexahydro-1H-4,7-**

**methanoindazole (5b):**  $^1\text{H-NMR}$  (400 MHz,  $\text{CDCl}_3$ )  $\delta$  7.47 (dd,  $J = 7.6, 2.0$  Hz, 1H), 7.37 (dd,  $J = 8.0, 2.0$  Hz, 1H), 7.28-7.18 (m, 2H), 6.93-6.86 (m, 4H), 4.29-4.24 (m, 1H), 4.13-4.07 (m, 1H), 4.03-3.91 (m, 3H), 3.83 (d,  $J = 9.6$  Hz, 1H), 2.34 (d,  $J = 4.4$  Hz, 1H), 2.16 (d,  $J = 3.6$  Hz, 1H), 1.92-1.64 (m, 8H), 1.53-1.38 (m, 3H),

1.31-1.24 (m, 1H), 1.19-1.15 (m, 1H), 1.13-1.07 (m, 1H);  $^{13}\text{C-NMR}$  (75 MHz,  $\text{CDCl}_3$ )  $\delta$  157.7, 156.5, 152.7, 136.4, 130.9, 130.5, 129.3, 128.2, 123.5, 120.3, 120.2, 113.2, 111.4, 73.4, 70.4, 68.4, 58.7, 43.5, 39.7, 33.3, 30.3, 29.9, 28.6, 27.3, 26.7, 24.2; HRMS (ESI) calcd for  $\text{C}_{26}\text{H}_{30}\text{N}_2\text{O}_2$  402.2302 [ $\text{M}^+$ ], found 402.2292.

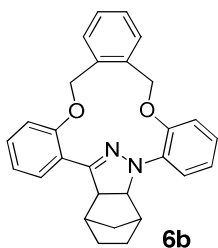

***o*-Xylylene-linked-1,3-bis(2-oxophenyl)-3a,4,5,6,7,7a-hexahydro-1H-4,7-**

**methanoindazole (6b):**  $^1\text{H-NMR}$  (500 MHz,  $\text{CDCl}_3$ )  $\delta$  7.54-750 (m, 2H), 7.44 (dd,  $J = 8.0, 2.0$  Hz, 1H), 7.42-7.39 (m, 2H), 7.32-7.23 (m, 3H), 7.17-7.14 (m, 1H), 7.09-7.05 (m, 1H), 6.98 (dd,  $J = 8.0, 1.5$  Hz, 1H), 6.92 (td,  $J = 7.5, 1.5$  Hz, 1H), 5.36 (d,  $J = 9.5$  Hz, 1H), 5.24 (dd,  $J = 20.5, 9.5$  Hz, 2H), 5.17 (d,  $J = 9.5$  Hz, 1H), 4.27 (d,  $J = 10.0$  Hz, 1H), 3.58 (d,  $J = 9.5$  Hz, 1H), 2.68-2.63 (m, 1H), 2.59-2.48

(m, 1H), 1.67-1.61 (m, 1H), 1.60-1.55 (m, 2H), 1.44-1.38 (m, 1H), 1.35-1.30 (m, 1H), 1.18-1.13 (m, 1H);  $^{13}\text{C-NMR}$  (75 MHz,  $\text{CDCl}_3$ )  $\delta$  157.2, 149.6, 147.7, 137.2, 137.0, 131.7, 131.2, 128.9, 128.7, 128.6, 128.6, 126.2, 123.8, 123.8, 123.7, 122.7, 121.2, 117.3, 75.6, 74.5, 68.1, 55.5, 41.4, 40.3, 33.3, 28.0, 24.3; HRMS (EI) calcd for  $\text{C}_{28}\text{H}_{26}\text{N}_2\text{O}_2$  422.1994 [ $\text{M}^+$ ], found 422.1989.



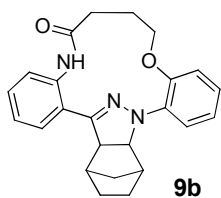

**1,3-Propane-linked-1-(2-oxophenyl)-3-(2-*N*-formamidophenyl)-3a,4,5,6,7,7a-hexahydro-1*H*-4,7-methanoindazole (9b):**  $^1\text{H-NMR}$  (400 MHz,  $\text{CDCl}_3$ )  $\delta$  11.93 (b, 1H), 8.64 (dd,  $J = 8.4, 0.8$  Hz, 1H), 7.36 (dd,  $J = 7.6, 1.6$  Hz, 1H), 7.30-7.26 (m, 1H), 7.07 (td,  $J = 7.6, 1.2$  Hz, 1H), 6.99-6.95 (m, 2H), 6.85-6.78 (m, 2H), 4.29 (d,  $J = 9.6$  Hz, 1H), 4.08-4.04 (m, 1H), 4.02-3.99 (m, 1H), 3.54 (d,  $J = 9.6$  Hz, 1H), 2.78-2.74 (m, 1H), 2.74-2.69 (m, 1H), 2.69-2.64 (m, 1H), 2.63-2.56 (m, 1H), 2.25-2.18 (m, 2H), 1.69-1.59 (m, 2H), 1.52-1.45 (m, 2H), 1.42-1.33 (m, 1H), 1.18-1.13 (m, 1H);  $^{13}\text{C-NMR}$  (75 MHz,  $\text{CDCl}_3$ )  $\delta$  173.0, 148.3, 148.0, 137.9, 132.8, 128.3, 127.0, 122.3, 121.8, 120.5, 119.8, 118.9, 115.7, 114.1, 69.7, 67.8, 54.1, 40.8, 40.6, 36.0, 33.2, 27.9, 25.6, 24.2; HRMS (EI) calcd for  $\text{C}_{24}\text{H}_{25}\text{N}_3\text{O}_2$  387.1947 [ $\text{M}^+$ ], found 387.1941.

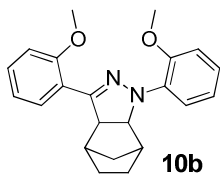

**1,3-bis(2-methoxyphenyl)-3a,4,5,6,7,7a-hexahydro-1*H*-4,7-methanoindazole (10b):**  $^1\text{H-NMR}$  (500 MHz,  $\text{CDCl}_3$ )  $\delta$  7.86-7.85 (m, 1H), 7.51-7.36 (m, 1H), 7.35-7.25 (m, 1H), 7.03-6.88 (m, 5H), 4.42-4.22 (m, 1H), 3.88 (s, 6H), 3.92-3.65 (m, 1H), 2.46-2.38 (m, 1H), 2.29-2.21 (m, 1H), 1.63-1.58 (m, 1H), 1.39-1.31 (m, 2H), 1.28-1.19 (m, 2H), 1.03-0.95 (m, 1H);  $^{13}\text{C-NMR}$  (75 MHz,  $\text{CDCl}_3$ )  $\delta$  157.1, 151.4, 149.0, 129.5, 129.5, 121.7, 121.3, 121.2, 121.2, 120.7, 119.6, 119.5, 111.5, 70.1, 57.9, 55.6, 55.5, 41.9, 39.6, 32.4, 27.7, 25.0; HRMS (EI) calcd for  $\text{C}_{22}\text{H}_{24}\text{N}_2\text{O}_2$  348.1838 [ $\text{M}^+$ ], found 348.1832.

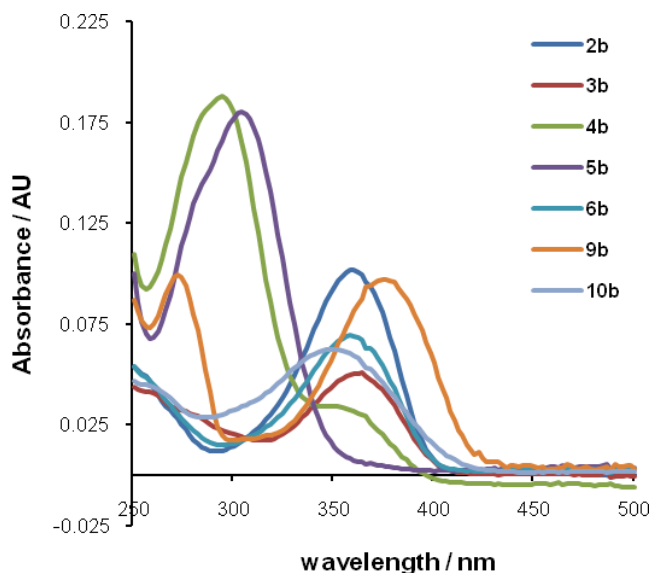

**Figure S1.** UV-Vis spectra of the norbornene-derived pyrazolines: Compounds were dissolved in a mixed ACN/PBS buffer (1: 1) solvent to derive the final concentrations of 5  $\mu\text{M}$  for **2b**, **3b**, **6b**, **9b-10b**, and 20  $\mu\text{M}$  for **4b**, **5b**.

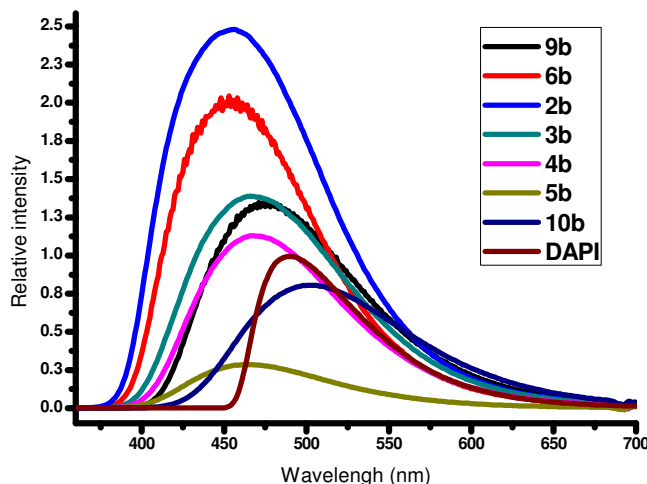

**Figure S2.** Normalized fluorescence spectra of the norbornene-derived pyrazolines: Compounds were dissolved in a mixed ACN/PBS buffer (1:1) solvent to derive final concentrations of 5  $\mu\text{M}$  for **2b**, **3b**, **6b**, **9b-10b**, and 20  $\mu\text{M}$  for **4b**, **5b**. The pyrazolines fluorescent intensities were normalized against DAPI.

### Quantum yield determination

The fluorescence spectra were measured for **2b-6b**, **9b**, and **10b** with excitation wavelength of 348 nm. The relative quantum yields were calculated by comparing the wavelength-integrated intensities of the norbornene-derived pyrazoline sample to that of DAPI standard using the following equation<sup>2</sup>:

$$\Phi_F = \Phi_{st} \frac{I_F}{I_{st}} \frac{OD_{st}}{OD_F} \frac{n_F^2}{n_{st}^2}$$

where  $\Phi$  is the quantum yield,  $I$  is the integrated intensity,  $n$  is the refractive index, and  $OD$  is the optical density. The subscript  $st$  refers to the reference fluorophore (DAPI).

### Labeling of chicken lysozyme with 5-norbornene-2-carboxylic acid

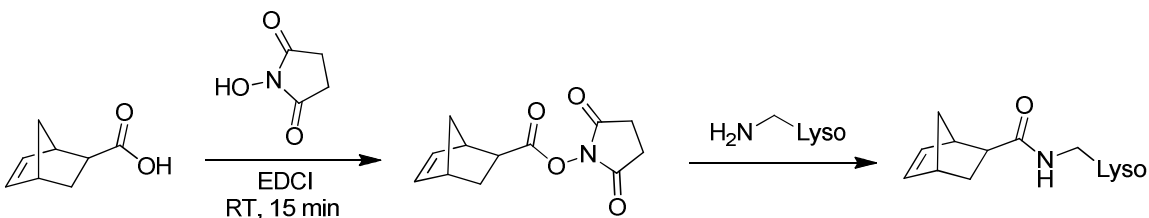

To a 600- $\mu\text{L}$  solution of 5-norbornene-2-carboxylic acid (25 mM in DMF) was added *N*-hydroxysuccinimide (5.6 mg, 75 mM) and *N*-(3-dimethylaminopropyl)-*N'*-ethylcarbodiimide hydrochloride (4.4 mg, 38 mM). The reaction mixture was vortexed for 15 min to afford the activated

norbornene. A 50- $\mu$ L aliquot of the reaction mixture was added to 450  $\mu$ L of a buffered solution of chicken egg white lysozyme (125  $\mu$ M in 100 mM  $\text{NaH}_2\text{PO}_4$ , 25 mM  $\text{NaOAc}$ , pH 8.5) and the mixture was rocked on a rotating shaker for 3h at room temperature. Afterwards, excess amount of small molecules was removed by protein spin columns (Pierce). The protein fraction was found to contain mainly singly- (Lyso-Nor) and doubly-labeled lysozyme (Lyso-d-Nor) as well as unreacted lysozyme (Lyso) in a 3:3:2 ratio, estimated on the basis of the extracted ion intensities in an LC-ESI/MS analysis. The identities of the major fractions were confirmed by the deconvoluted intact masses: Lyso calcd 14304 Da, found  $14305.2 \pm 0.9$  Da; Lyso-Nor, calcd 14424 Da, found  $14425.4 \pm 0.5$ ; Lyso-d-Nor, calcd 14544 Da, found  $14545 \pm 1$  Da.

### **Photoinduced cycloaddition of Lyso-norbornene with macrocyclic tetrazoles**

To a 20- $\mu$ L solution of either Lyso or Lyso-Nor (10  $\mu$ M) in PBS buffer, pH 7.4, in a 96-well microtiter plate was added 1  $\mu$ L of the various tetrazoles (4 mM in DMSO, final concentration is 200  $\mu$ M). The mixtures were irradiated with a handheld 302-nm UV lamp for 1 min before quenching by addition of 5  $\mu$ L of 6 $\times$  SDS sample buffer, boiled for 5 min at 95  $^\circ\text{C}$ , loaded onto a NuPAGE 12% Bis-Tris gel (Invitrogen), and then subjected to protein electrophoresis. The Lyso-Pyr cycloadducts in the gel were visualized by illuminating the gel with a handheld 365-nm UV lamp and the resulting image was captured by a digital camera. After the image acquisition, the same gel was stained with Coomassie blue to confirm the size and equal loading of proteins. The cycloaddition was specific to the norbornene-labeled lysozyme and the 302-nm UV irradiation was needed for reaction to proceed as indicated in the control experiment (Figure S3).

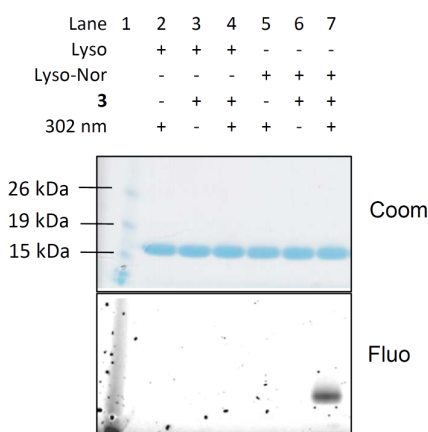

**Figure S3.** Cycloaddition reaction of Lyso-Norbornene with the macrocyclic tetrazole **3**: top panel, Coomassie blue staining of the SDS-PAGE gel; bottom panel, inverted fluorescence imaging of the same gel with  $\lambda_{\text{ex}} = 365$  nm.

**Reference:**

- (1) Ito, S.; Tanaka, Y.; Kakehi, A.; Kondo, K. *Bull. Chem. Soc. Jpn.* **1976**, *49*, 1920.
- (2) (a) Du, H.; Fuh, R. A. J.; Corkan, Li, A.; Lindsey, J. S. *Photochem. Photobiol.* **1998**, *68*, 141. (b) Hard, T.; Fan, P.; and Kearns, D. R. *Photochem. Photobiol.* **1990**, *51*, 77. (c) Williams, A. T. R.; Winfield, S. A.; and Miller, J. N. *Analyst* **1983**, *108*, 1067.

**Table S1.** Crystal data and structure refinement for tetrazole **6**.

|                                                     |                                                               |                            |
|-----------------------------------------------------|---------------------------------------------------------------|----------------------------|
| Identification code                                 | tetrazole <b>6</b>                                            |                            |
| Empirical formula                                   | C <sub>21</sub> H <sub>16</sub> N <sub>4</sub> O <sub>2</sub> |                            |
| Formula weight                                      | 356.38                                                        |                            |
| Temperature                                         | 100.0(1) K                                                    |                            |
| Wavelength                                          | 0.71073 Å                                                     |                            |
| Crystal system                                      | Monoclinic                                                    |                            |
| Space group                                         | <i>P</i> 2 <sub>1</sub> / <i>c</i>                            |                            |
| Unit cell dimensions                                | <i>a</i> = 9.1339(7) Å                                        | $\alpha = 90^\circ$        |
|                                                     | <i>b</i> = 11.9708(9) Å                                       | $\beta = 100.414(2)^\circ$ |
|                                                     | <i>c</i> = 15.7136(12) Å                                      | $\gamma = 90^\circ$        |
| Volume                                              | 1689.8(2) Å <sup>3</sup>                                      |                            |
| <i>Z</i>                                            | 4                                                             |                            |
| Density (calculated)                                | 1.401 Mg/m <sup>3</sup>                                       |                            |
| Absorption coefficient                              | 0.093 mm <sup>-1</sup>                                        |                            |
| <i>F</i> (000)                                      | 744                                                           |                            |
| Crystal color, morphology                           | colorless, block                                              |                            |
| Crystal size                                        | 0.36 x 0.32 x 0.24 mm <sup>3</sup>                            |                            |
| Theta range for data collection                     | 2.15 to 37.78°                                                |                            |
| Index ranges                                        | -15 ≤ <i>h</i> ≤ 15, -20 ≤ <i>k</i> ≤ 20, -26 ≤ <i>l</i> ≤ 26 |                            |
| Reflections collected                               | 46895                                                         |                            |
| Independent reflections                             | 9002 [ <i>R</i> (int) = 0.0361]                               |                            |
| Observed reflections                                | 6877                                                          |                            |
| Completeness to theta = 37.78°                      | 99.2%                                                         |                            |
| Absorption correction                               | Multi-scan                                                    |                            |
| Max. and min. transmission                          | 0.9779 and 0.9671                                             |                            |
| Refinement method                                   | Full-matrix least-squares on <i>F</i> <sup>2</sup>            |                            |
| Data / restraints / parameters                      | 9002 / 4 / 253                                                |                            |
| Goodness-of-fit on <i>F</i> <sup>2</sup>            | 1.029                                                         |                            |
| Final <i>R</i> indices [ <i>I</i> > 2σ( <i>I</i> )] | <i>R</i> 1 = 0.0486, <i>wR</i> 2 = 0.1291                     |                            |
| <i>R</i> indices (all data)                         | <i>R</i> 1 = 0.0672, <i>wR</i> 2 = 0.1419                     |                            |
| Largest diff. peak and hole                         | 0.600 and -0.206 e.Å <sup>-3</sup>                            |                            |

**Table S2.** Crystal data and structure refinement for tetrazole **9**.

|                                                     |                                                               |                           |
|-----------------------------------------------------|---------------------------------------------------------------|---------------------------|
| Identification code                                 | tetrazole <b>9</b>                                            |                           |
| Empirical formula                                   | C <sub>17</sub> H <sub>15</sub> N <sub>5</sub> O <sub>2</sub> |                           |
| Formula weight                                      | 321.34                                                        |                           |
| Temperature                                         | 100.0(1) K                                                    |                           |
| Wavelength                                          | 0.71073 Å                                                     |                           |
| Crystal system                                      | Monoclinic                                                    |                           |
| Space group                                         | <i>P</i> 2 <sub>1</sub> / <i>c</i>                            |                           |
| Unit cell dimensions                                | <i>a</i> = 9.8666(9) Å                                        | $\alpha = 90^\circ$       |
|                                                     | <i>b</i> = 8.8649(8) Å                                        | $\beta = 91.391(2)^\circ$ |
|                                                     | <i>c</i> = 16.9787(15) Å                                      | $\gamma = 90^\circ$       |
| Volume                                              | 1484.6(2) Å <sup>3</sup>                                      |                           |
| <i>Z</i>                                            | 4                                                             |                           |
| Density (calculated)                                | 1.438 Mg/m <sup>3</sup>                                       |                           |
| Absorption coefficient                              | 0.099 mm <sup>-1</sup>                                        |                           |
| <i>F</i> (000)                                      | 672                                                           |                           |
| Crystal color, morphology                           | colorless, block                                              |                           |
| Crystal size                                        | 0.28 x 0.24 x 0.20 mm <sup>3</sup>                            |                           |
| Theta range for data collection                     | 2.06 to 37.78°                                                |                           |
| Index ranges                                        | -16 ≤ <i>h</i> ≤ 17, -15 ≤ <i>k</i> ≤ 15, -29 ≤ <i>l</i> ≤ 29 |                           |
| Reflections collected                               | 53010                                                         |                           |
| Independent reflections                             | 7940 [ <i>R</i> (int) = 0.0366]                               |                           |
| Observed reflections                                | 6550                                                          |                           |
| Completeness to theta = 37.78°                      | 99.7%                                                         |                           |
| Absorption correction                               | Multi-scan                                                    |                           |
| Max. and min. transmission                          | 0.9804 and 0.9728                                             |                           |
| Refinement method                                   | Full-matrix least-squares on <i>F</i> <sup>2</sup>            |                           |
| Data / restraints / parameters                      | 7940 / 0 / 221                                                |                           |
| Goodness-of-fit on <i>F</i> <sup>2</sup>            | 1.052                                                         |                           |
| Final <i>R</i> indices [ <i>I</i> > 2σ( <i>I</i> )] | <i>R</i> 1 = 0.0413, <i>wR</i> 2 = 0.1126                     |                           |
| <i>R</i> indices (all data)                         | <i>R</i> 1 = 0.0508, <i>wR</i> 2 = 0.1207                     |                           |
| Largest diff. peak and hole                         | 0.627 and -0.237 e.Å <sup>-3</sup>                            |                           |

**Table S3.** Crystal data and structure refinement for pyrazoline **3b**.

|                                                     |                                                               |                        |
|-----------------------------------------------------|---------------------------------------------------------------|------------------------|
| Identification code                                 | pyrazoline <b>3b</b>                                          |                        |
| Empirical formula                                   | C <sub>24</sub> H <sub>26</sub> N <sub>2</sub> O <sub>2</sub> |                        |
| Formula weight                                      | 374.47                                                        |                        |
| Temperature                                         | 100.0(1) K                                                    |                        |
| Wavelength                                          | 0.71073 Å                                                     |                        |
| Crystal system                                      | Triclinic                                                     |                        |
| Space group                                         | <i>P</i> -1                                                   |                        |
| Unit cell dimensions                                | <i>a</i> = 9.714(3) Å                                         | $\alpha$ = 114.021(5)° |
|                                                     | <i>b</i> = 10.750(3) Å                                        | $\beta$ = 103.164(5)°  |
|                                                     | <i>c</i> = 10.944(3) Å                                        | $\gamma$ = 103.862(5)° |
| Volume                                              | 942.8(4) Å <sup>3</sup>                                       |                        |
| <i>Z</i>                                            | 2                                                             |                        |
| Density (calculated)                                | 1.319 Mg/m <sup>3</sup>                                       |                        |
| Absorption coefficient                              | 0.084 mm <sup>-1</sup>                                        |                        |
| <i>F</i> (000)                                      | 400                                                           |                        |
| Crystal color, morphology                           | pale yellow, plate                                            |                        |
| Crystal size                                        | 0.28 x 0.20 x 0.08 mm <sup>3</sup>                            |                        |
| Theta range for data collection                     | 2.19 to 33.73°                                                |                        |
| Index ranges                                        | -15 ≤ <i>h</i> ≤ 15, -16 ≤ <i>k</i> ≤ 16, -17 ≤ <i>l</i> ≤ 17 |                        |
| Reflections collected                               | 18818                                                         |                        |
| Independent reflections                             | 7448 [ <i>R</i> (int) = 0.0482]                               |                        |
| Observed reflections                                | 4578                                                          |                        |
| Completeness to theta = 33.73°                      | 98.9%                                                         |                        |
| Absorption correction                               | Multi-scan                                                    |                        |
| Max. and min. transmission                          | 0.9933 and 0.9768                                             |                        |
| Refinement method                                   | Full-matrix least-squares on <i>F</i> <sup>2</sup>            |                        |
| Data / restraints / parameters                      | 7448 / 0 / 357                                                |                        |
| Goodness-of-fit on <i>F</i> <sup>2</sup>            | 1.022                                                         |                        |
| Final <i>R</i> indices [ <i>I</i> > 2σ( <i>I</i> )] | <i>R</i> 1 = 0.0565, <i>wR</i> 2 = 0.1354                     |                        |
| <i>R</i> indices (all data)                         | <i>R</i> 1 = 0.1026, <i>wR</i> 2 = 0.1591                     |                        |
| Largest diff. peak and hole                         | 0.444 and -0.333 e.Å <sup>-3</sup>                            |                        |

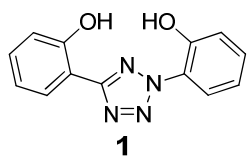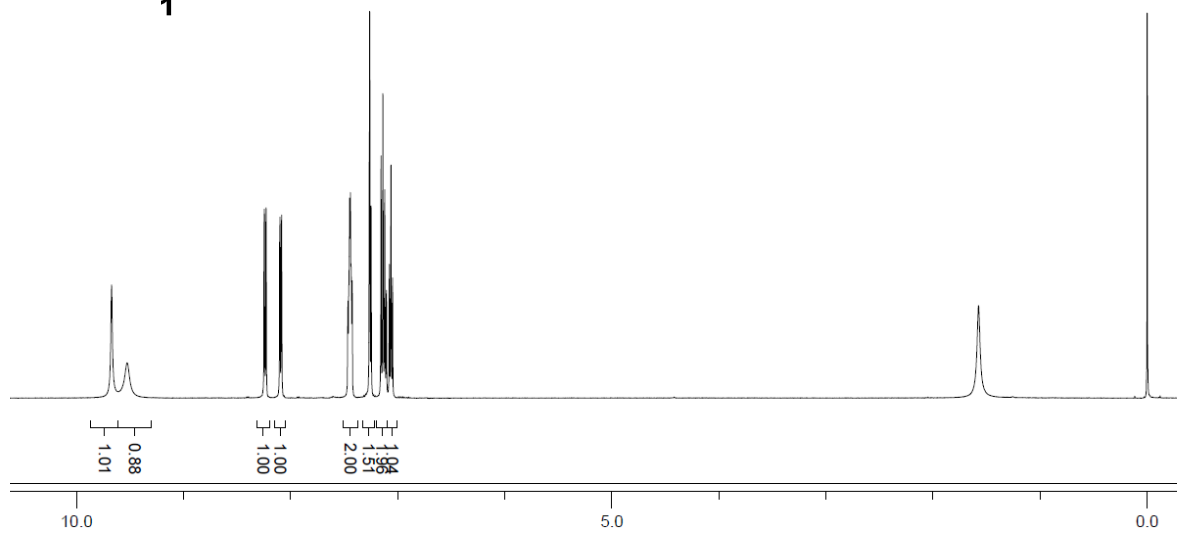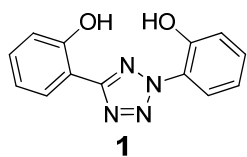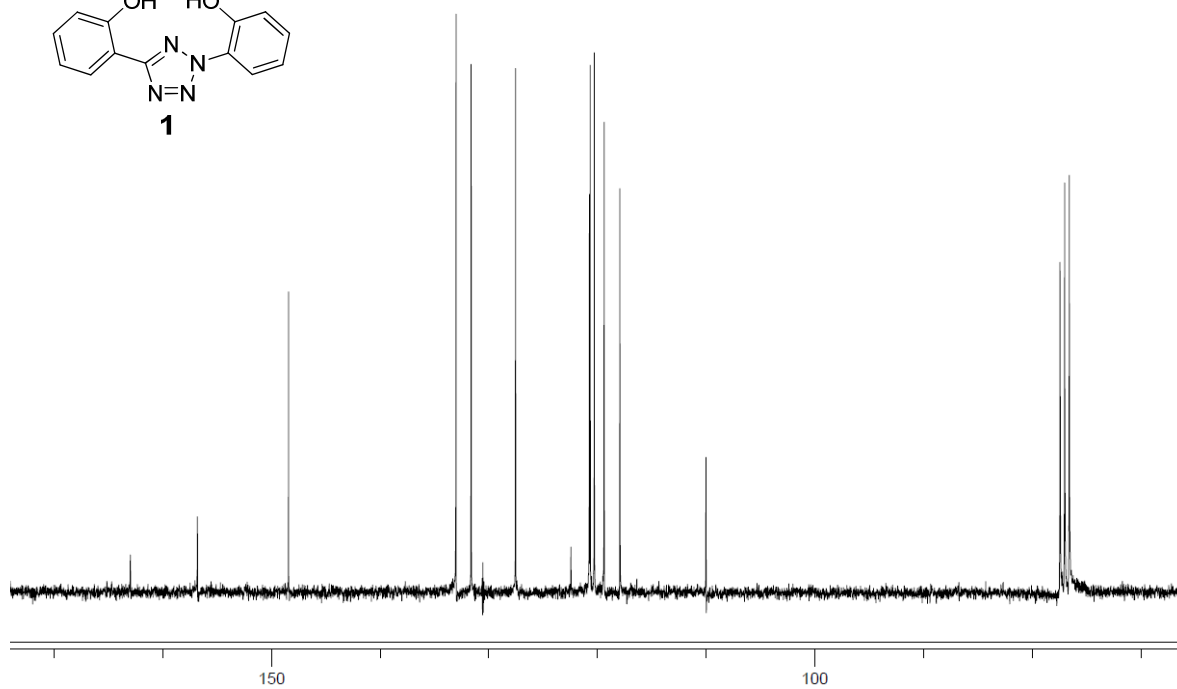



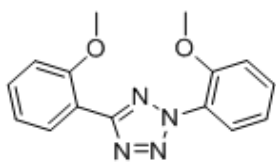

**10**

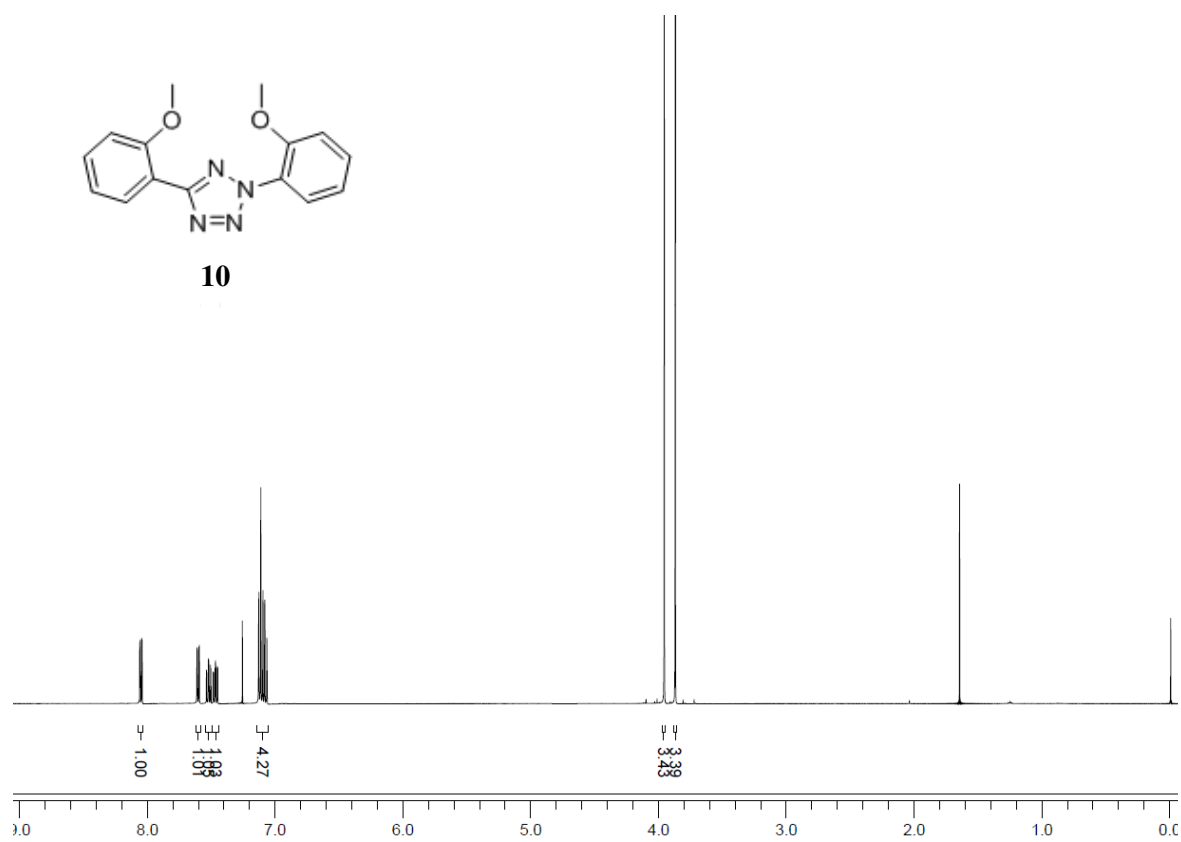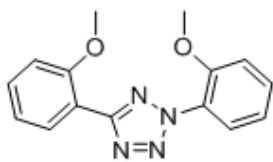

**10**

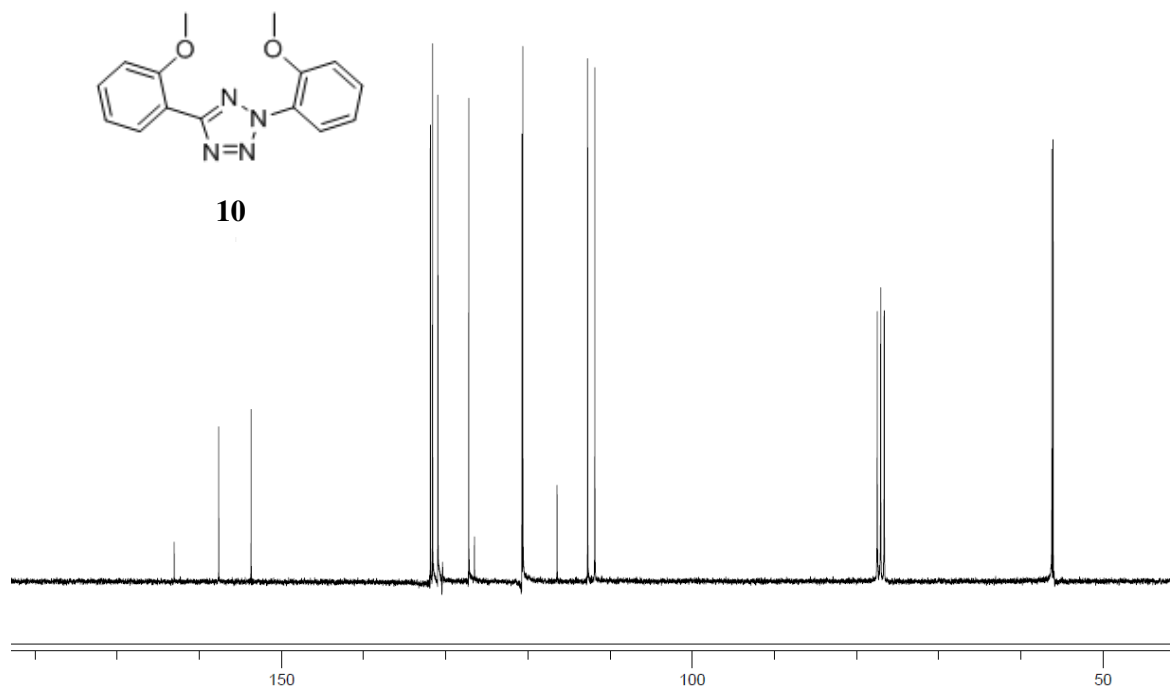

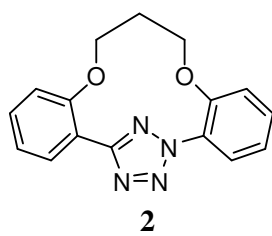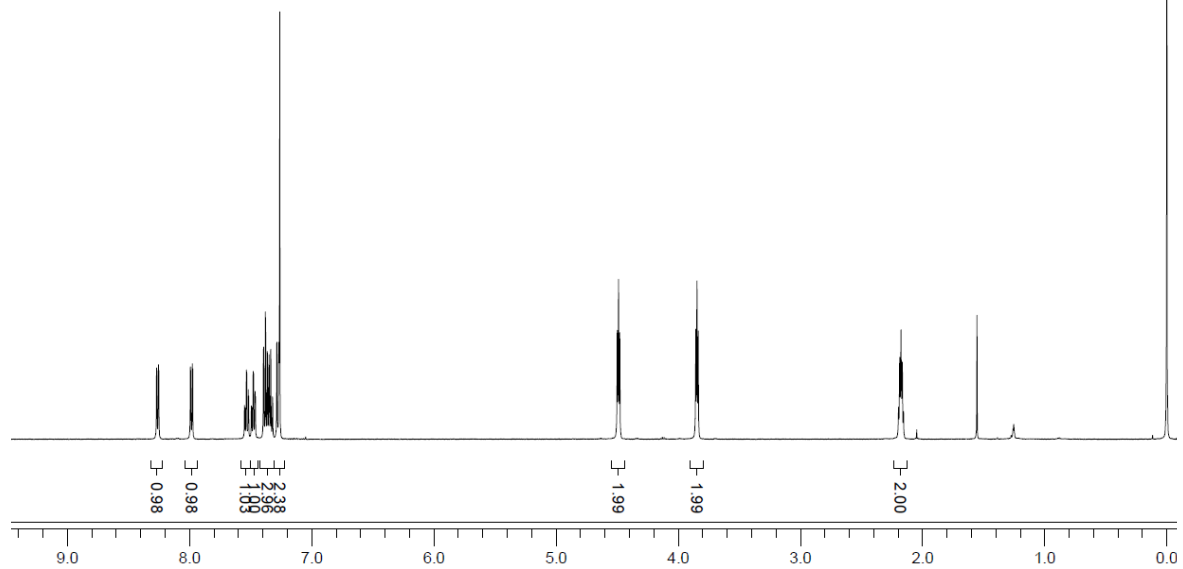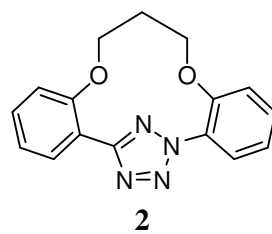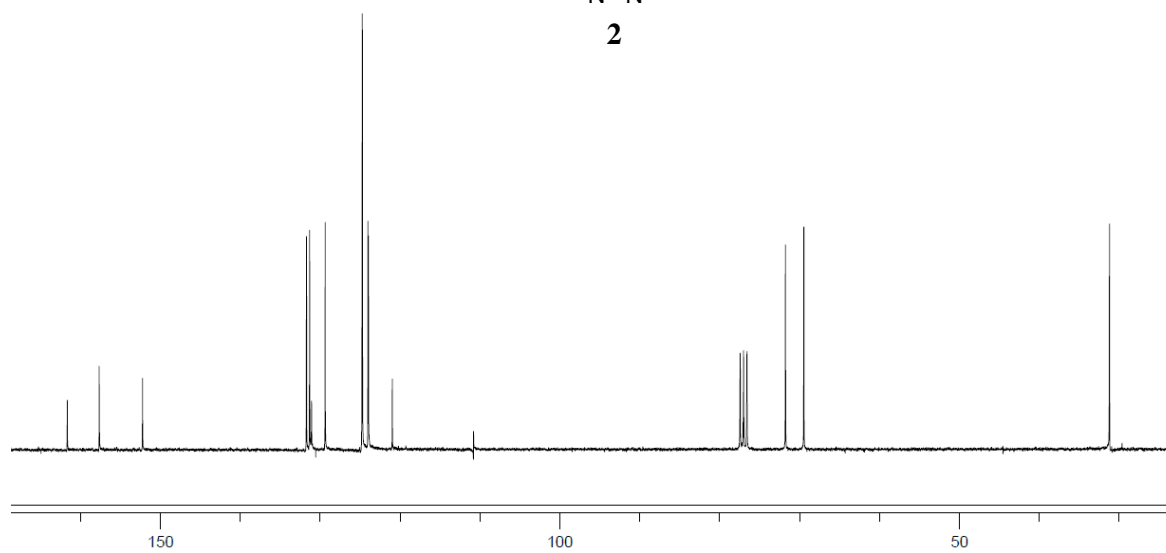

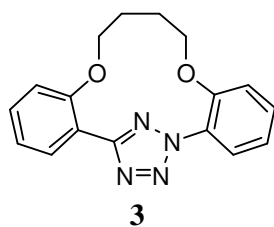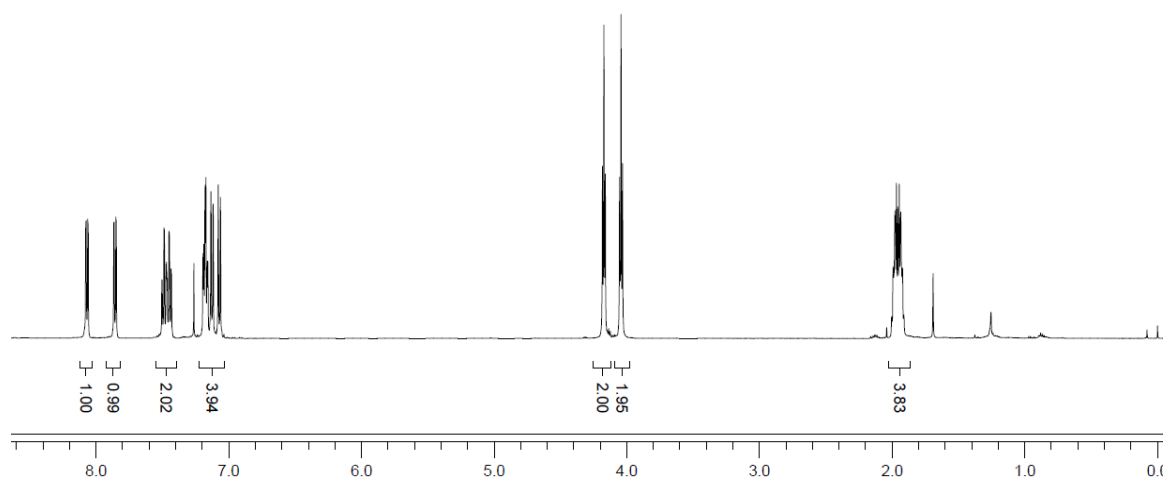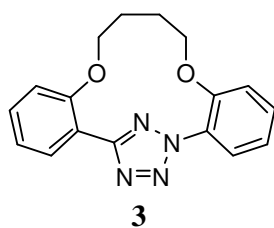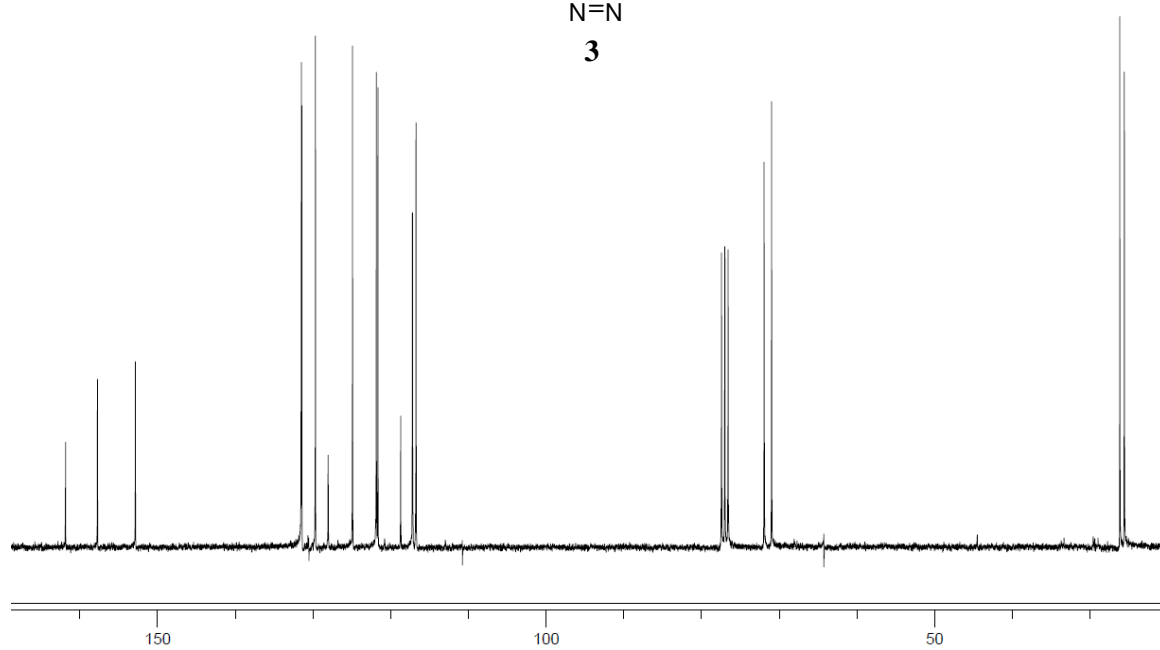

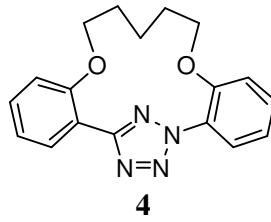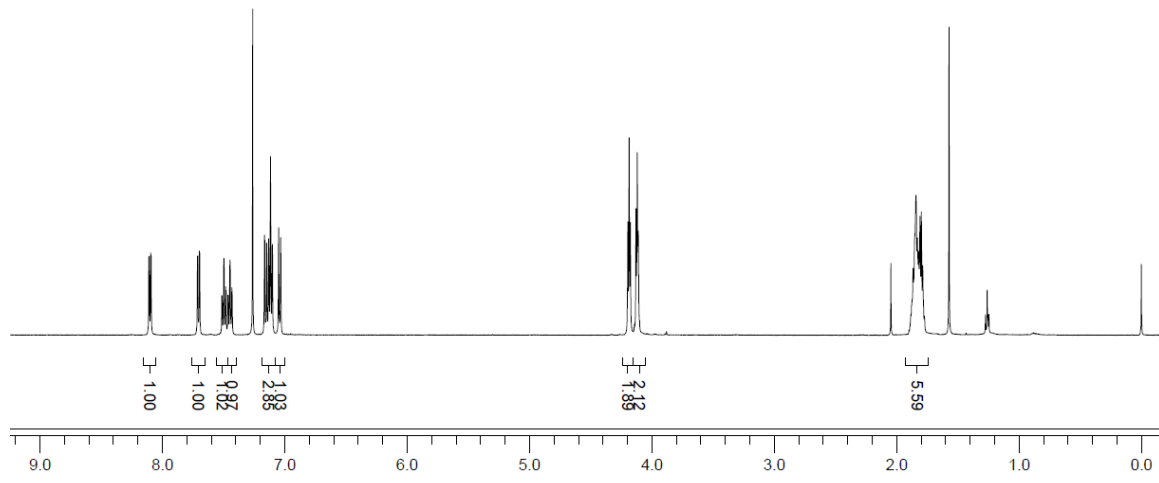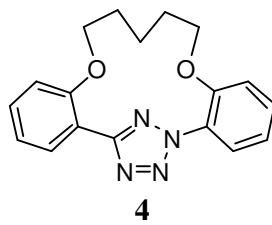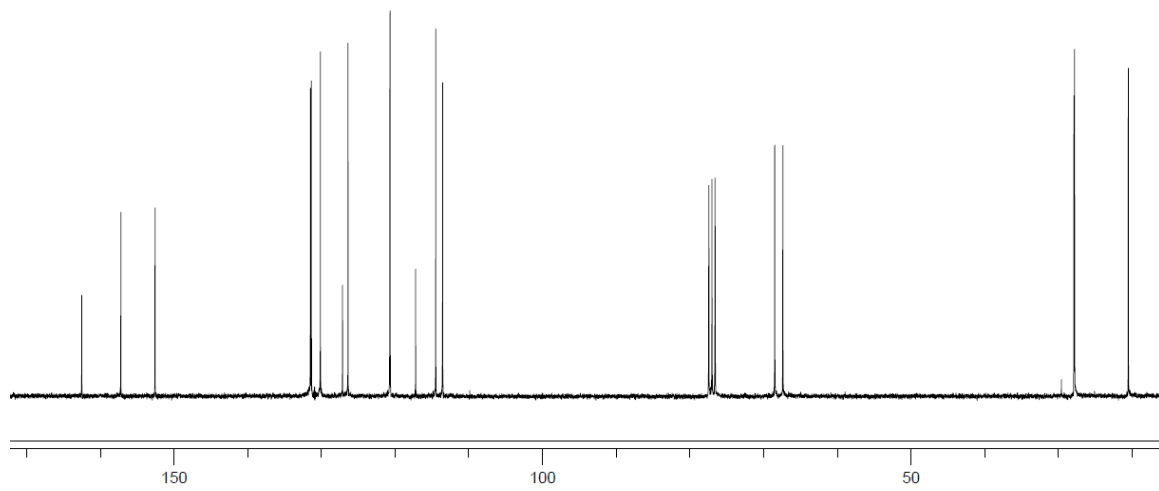

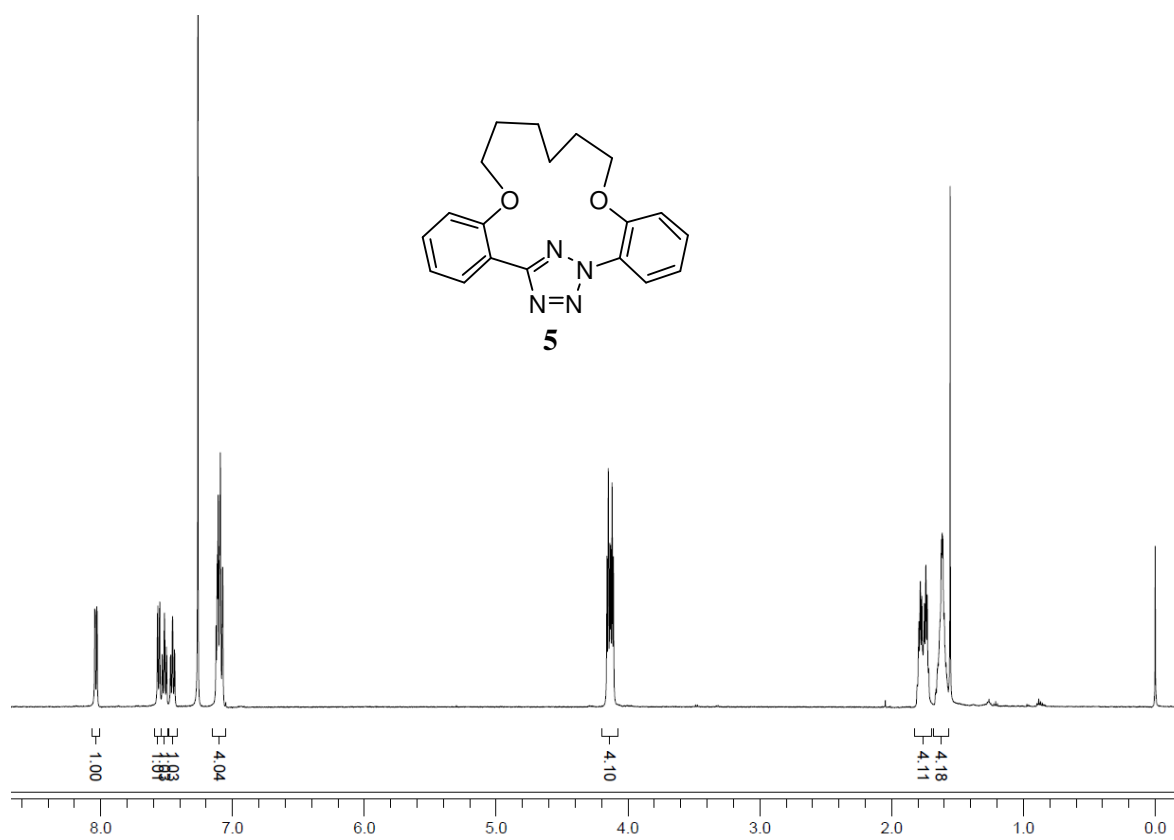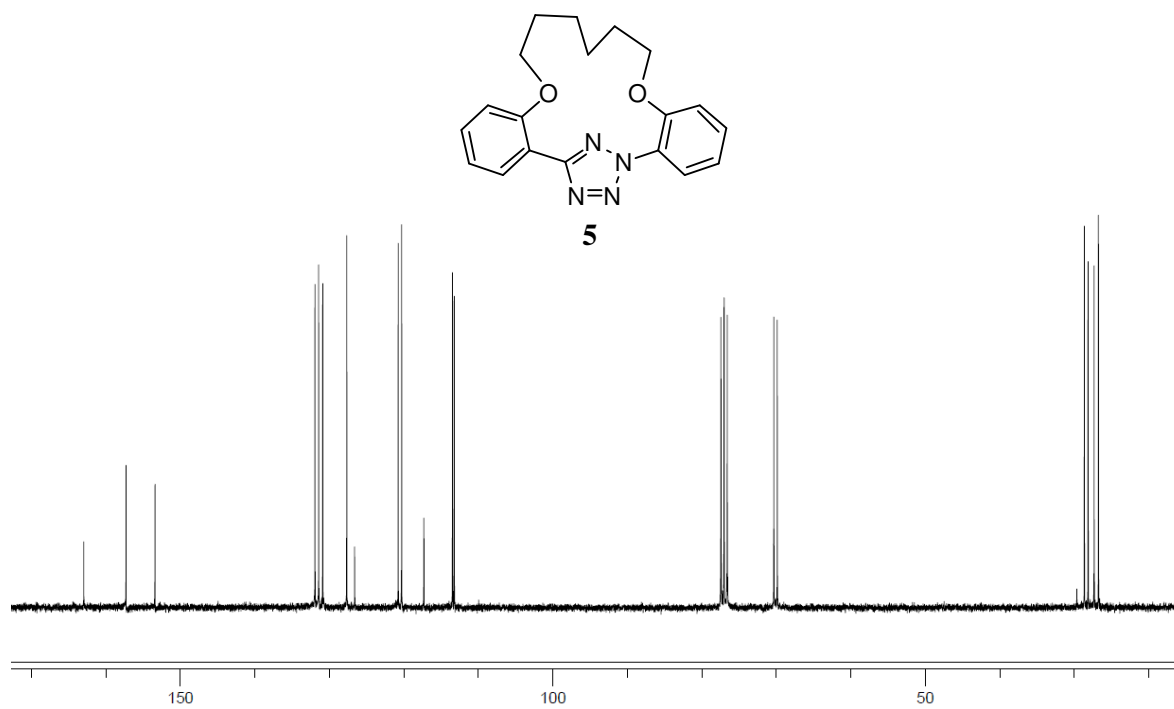

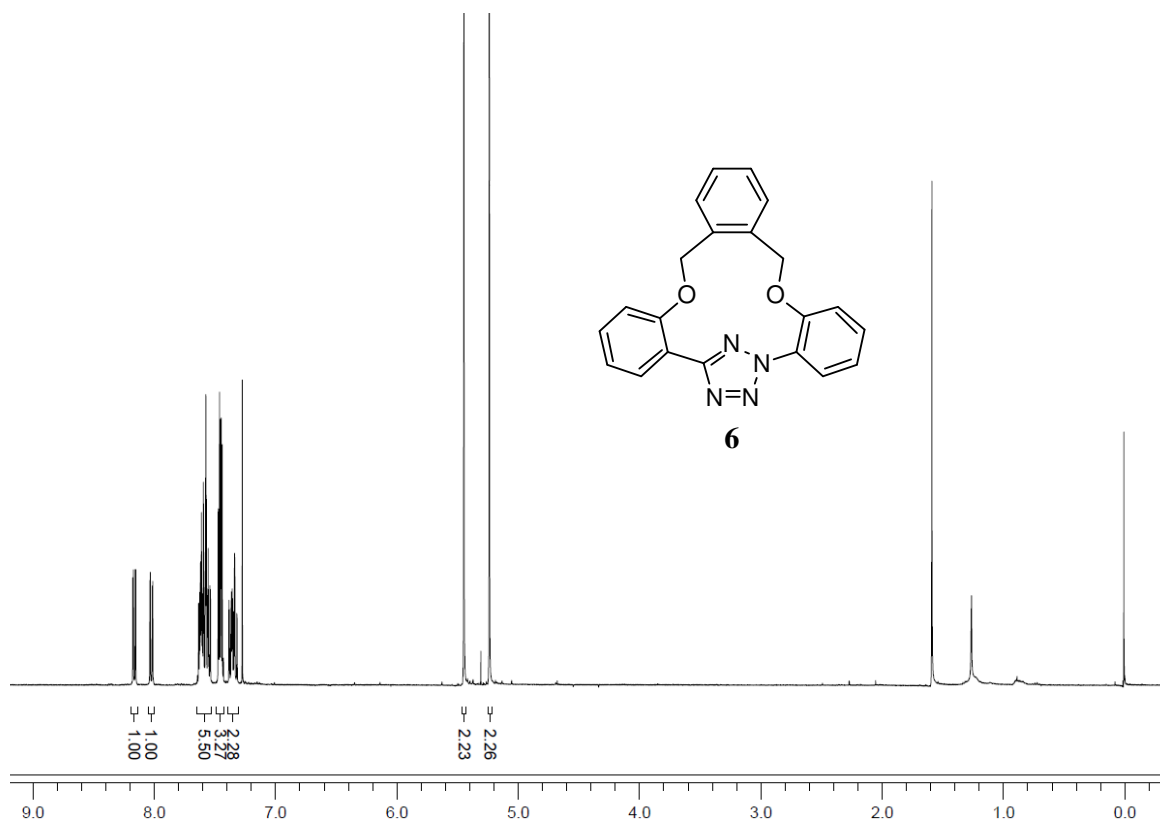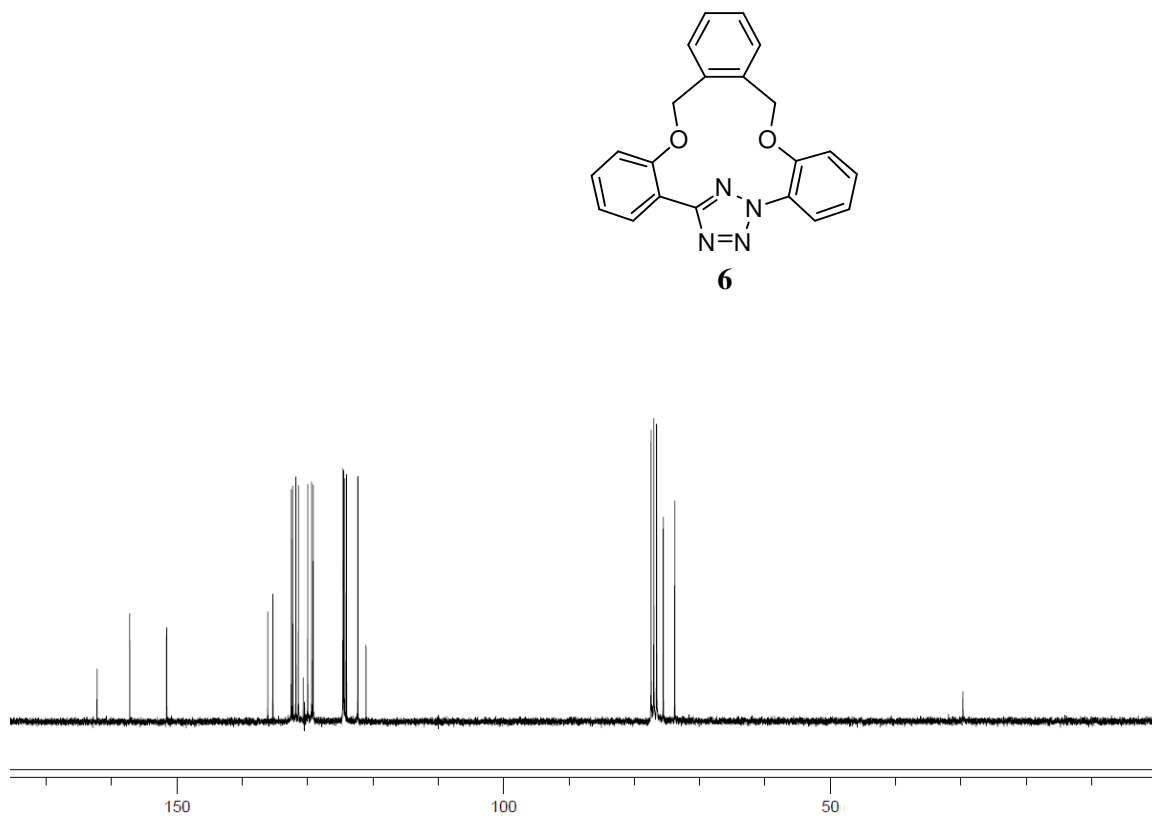

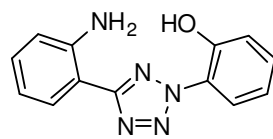

7

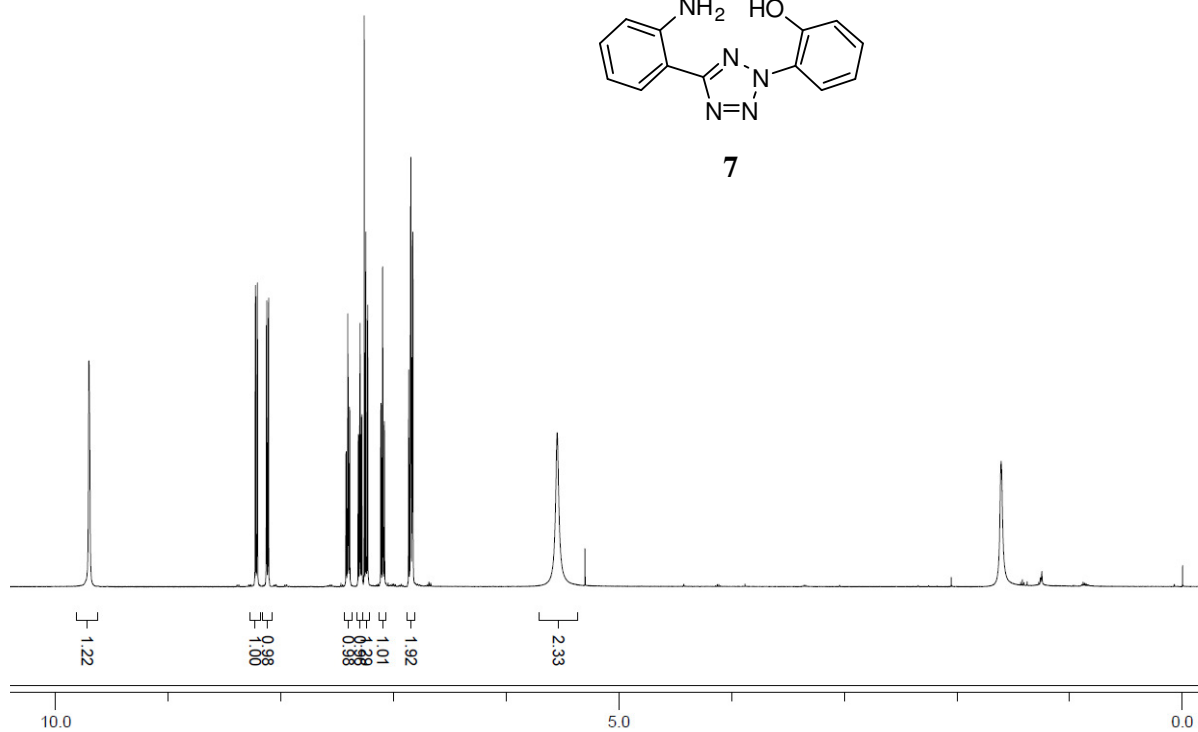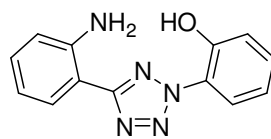

7

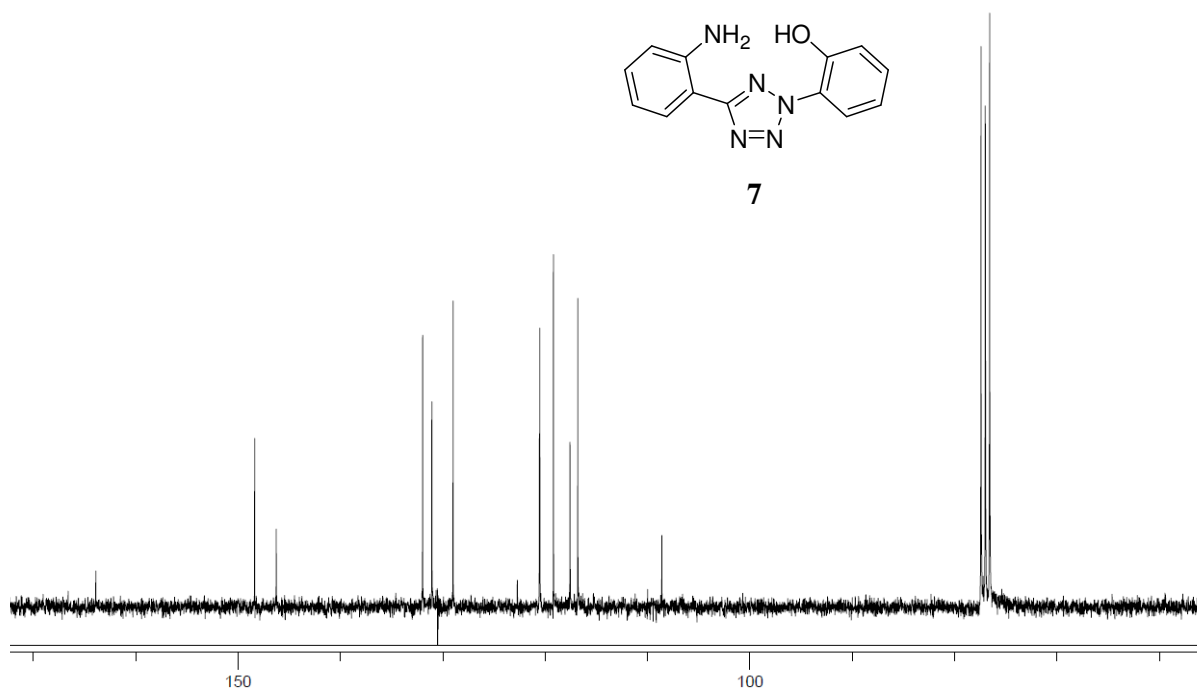

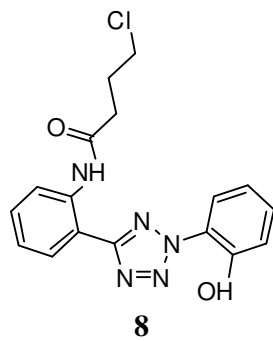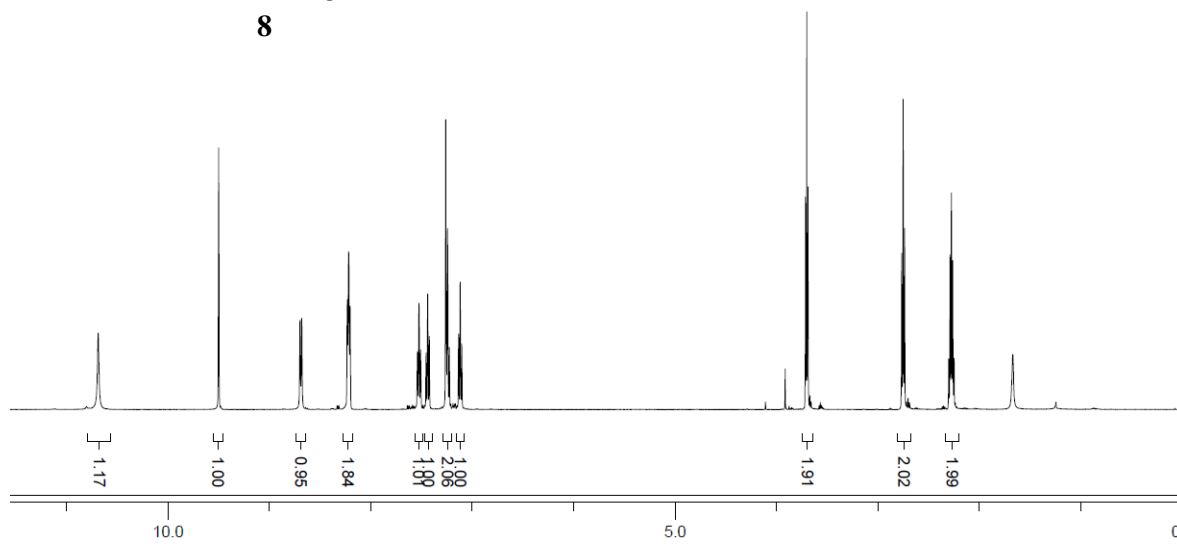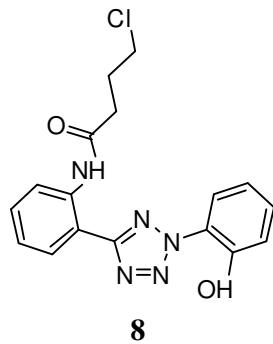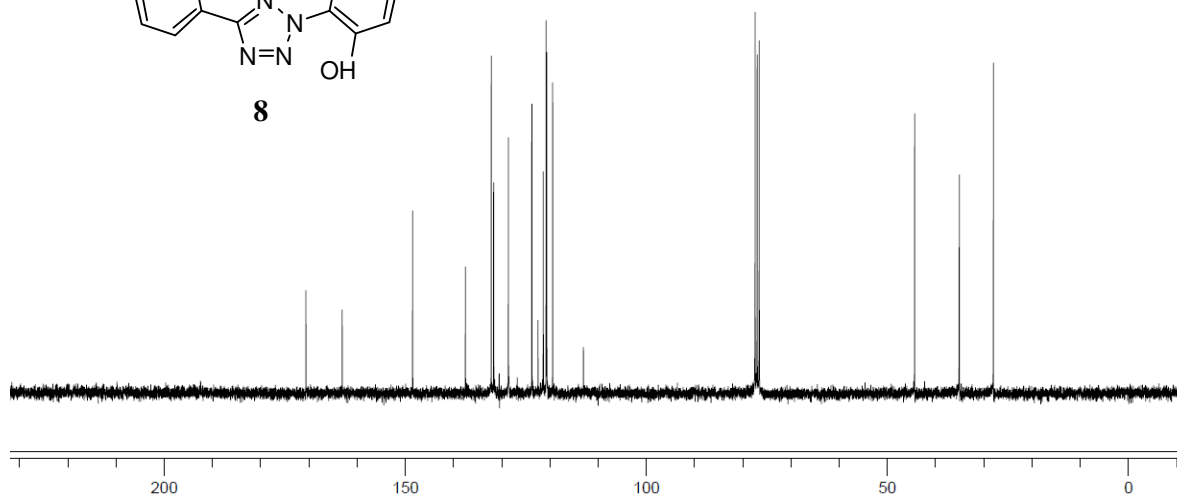



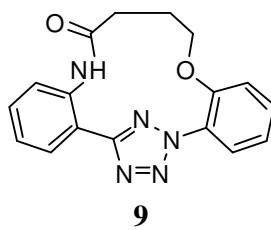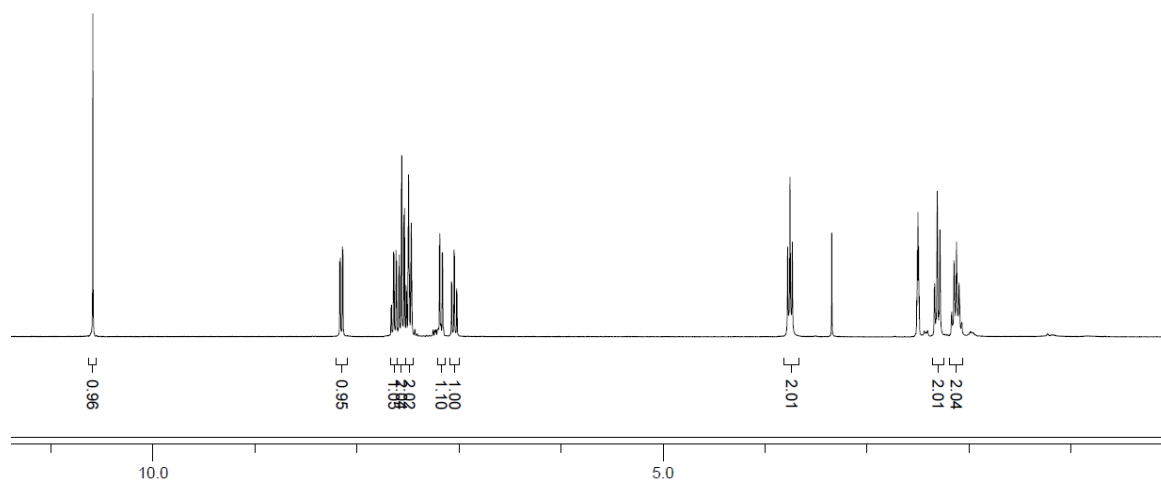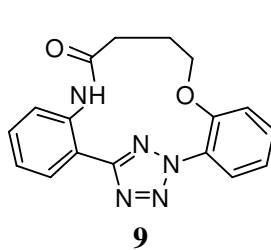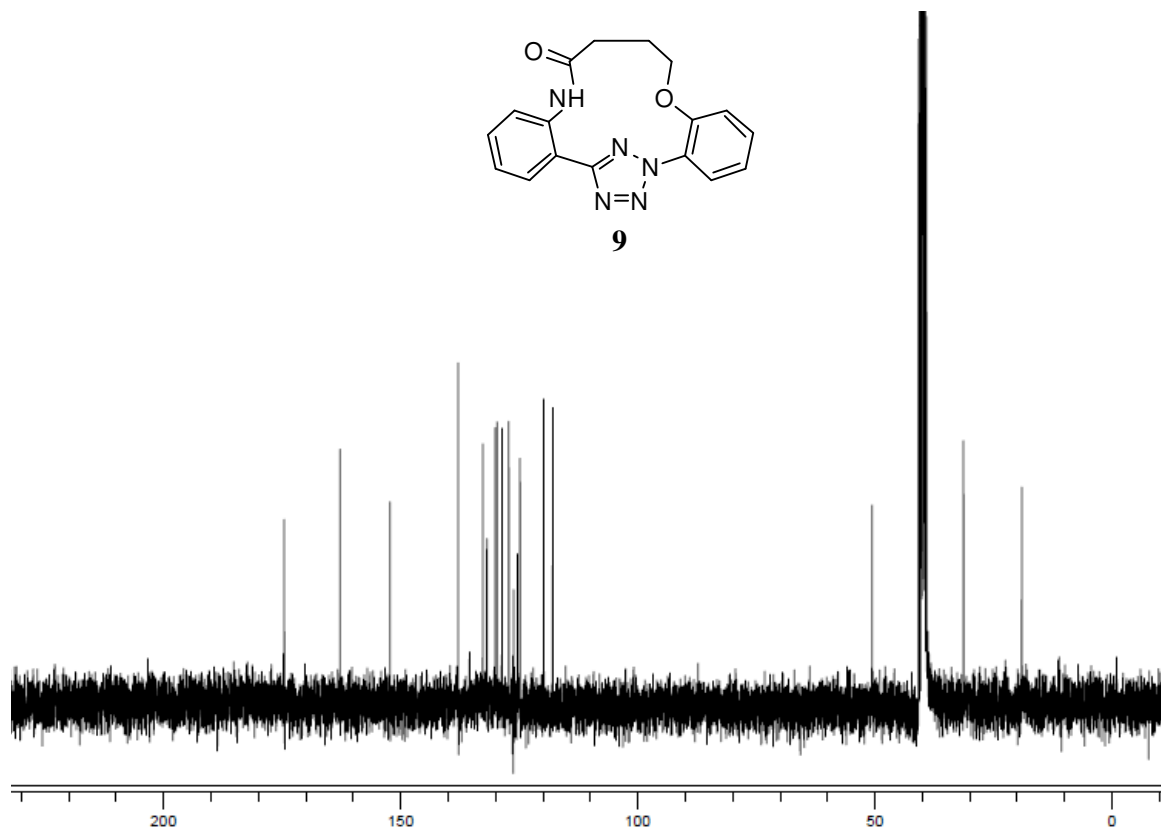

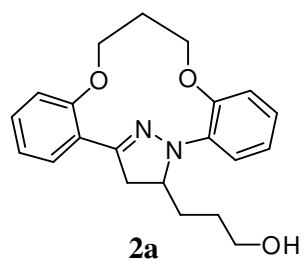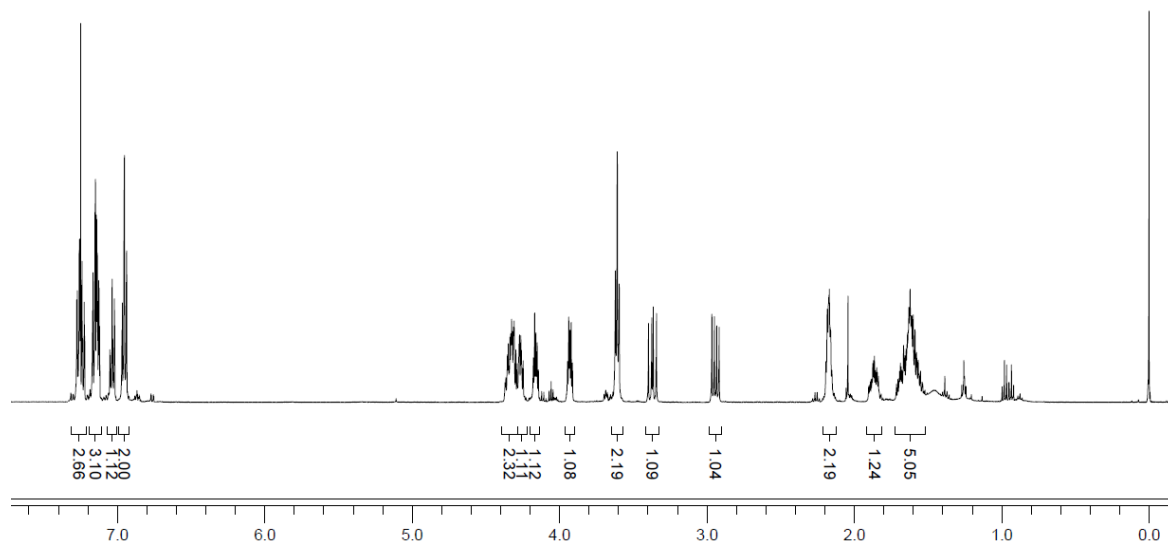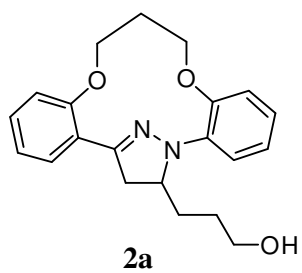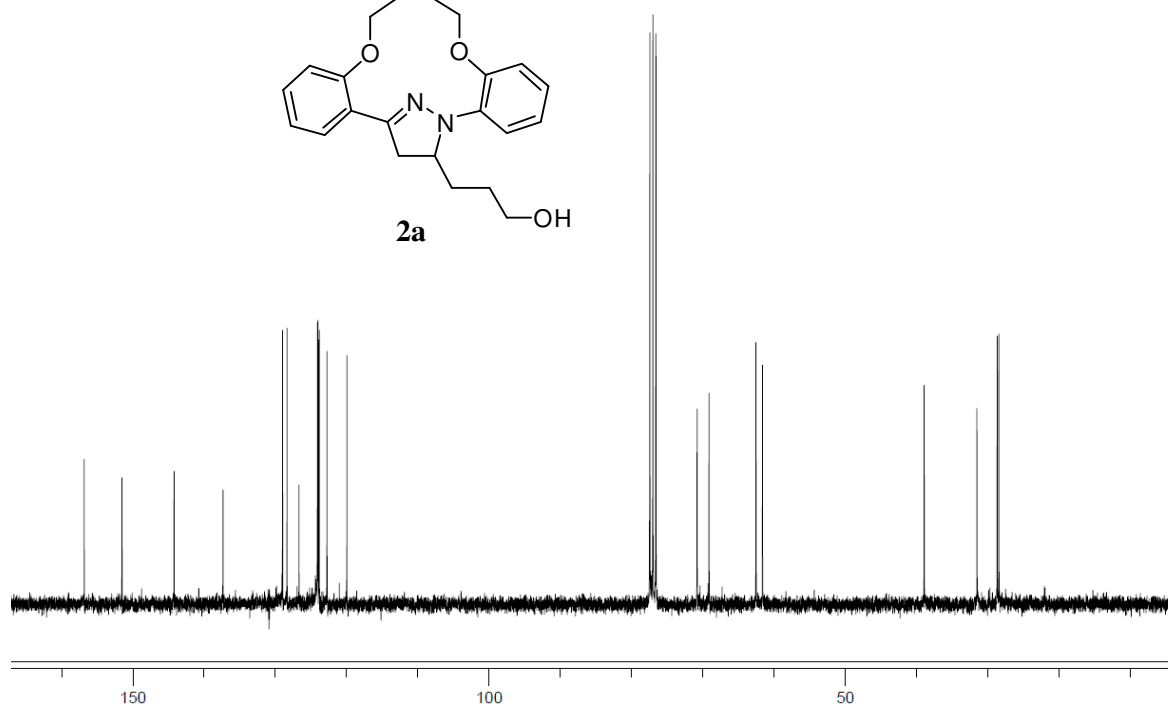

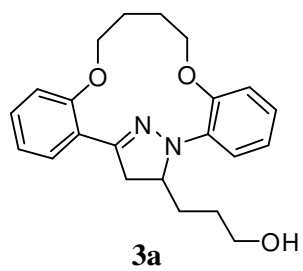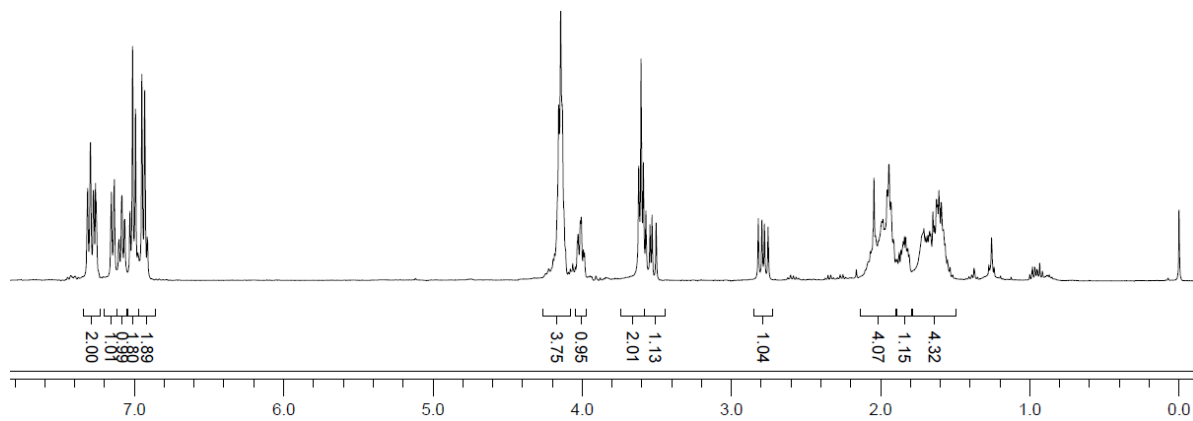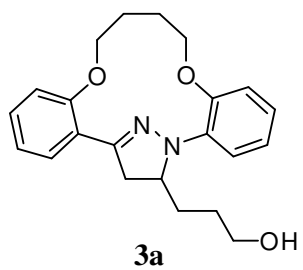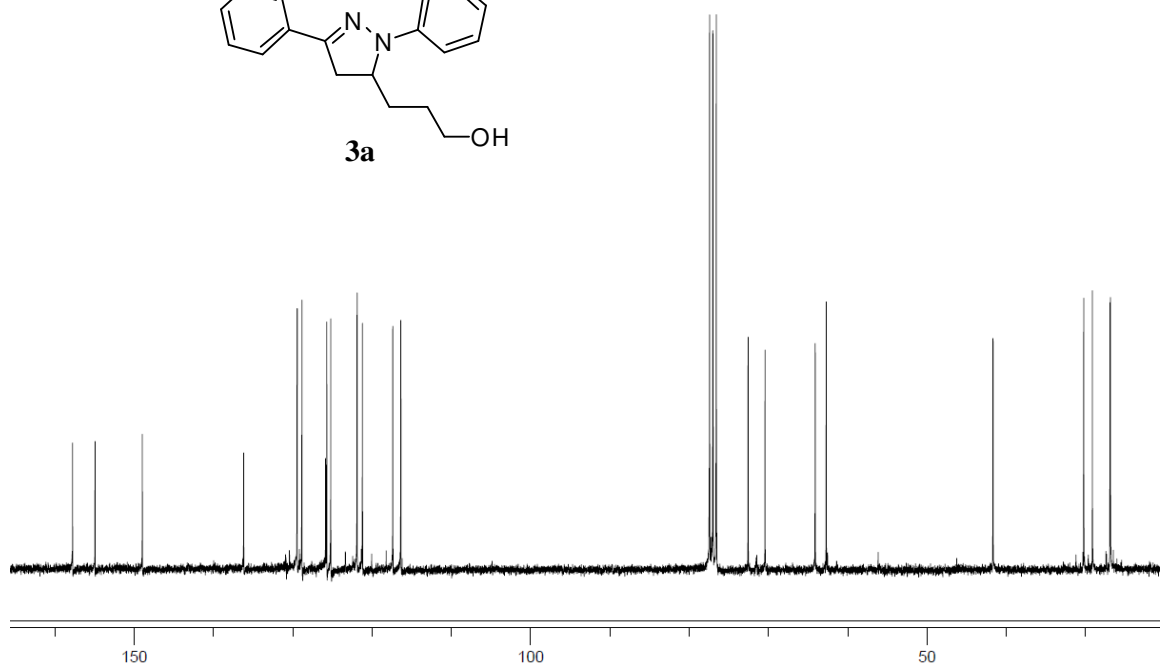

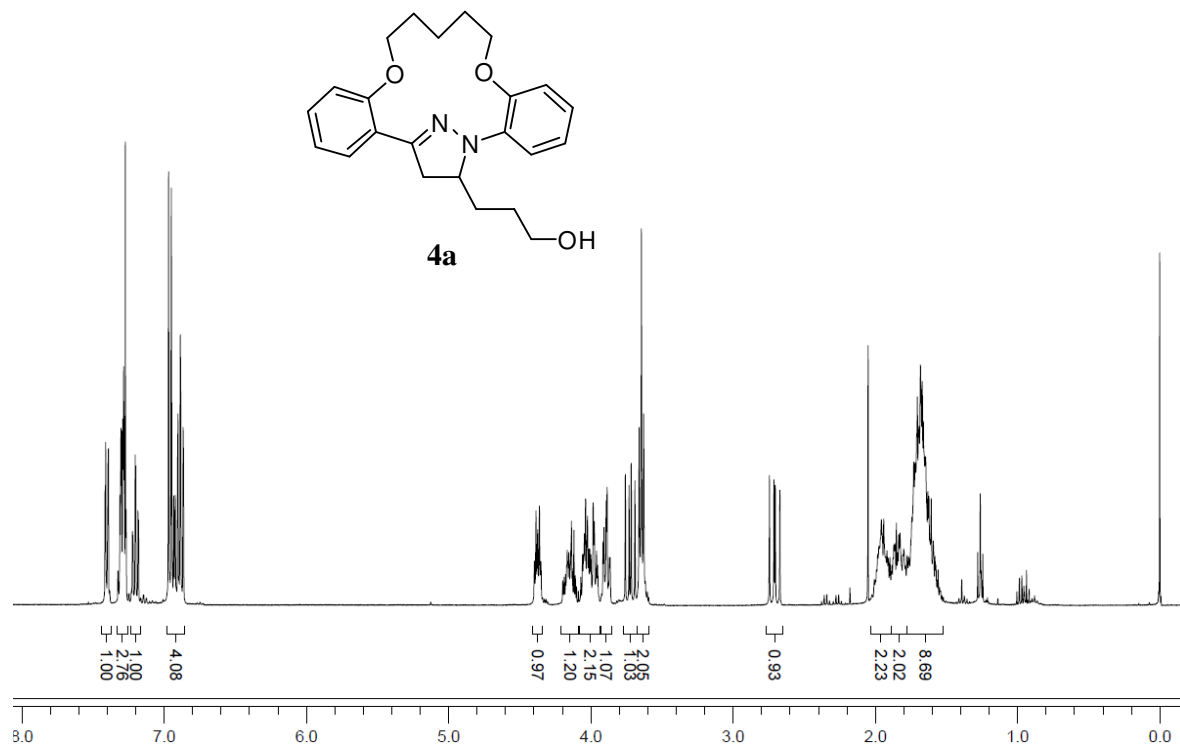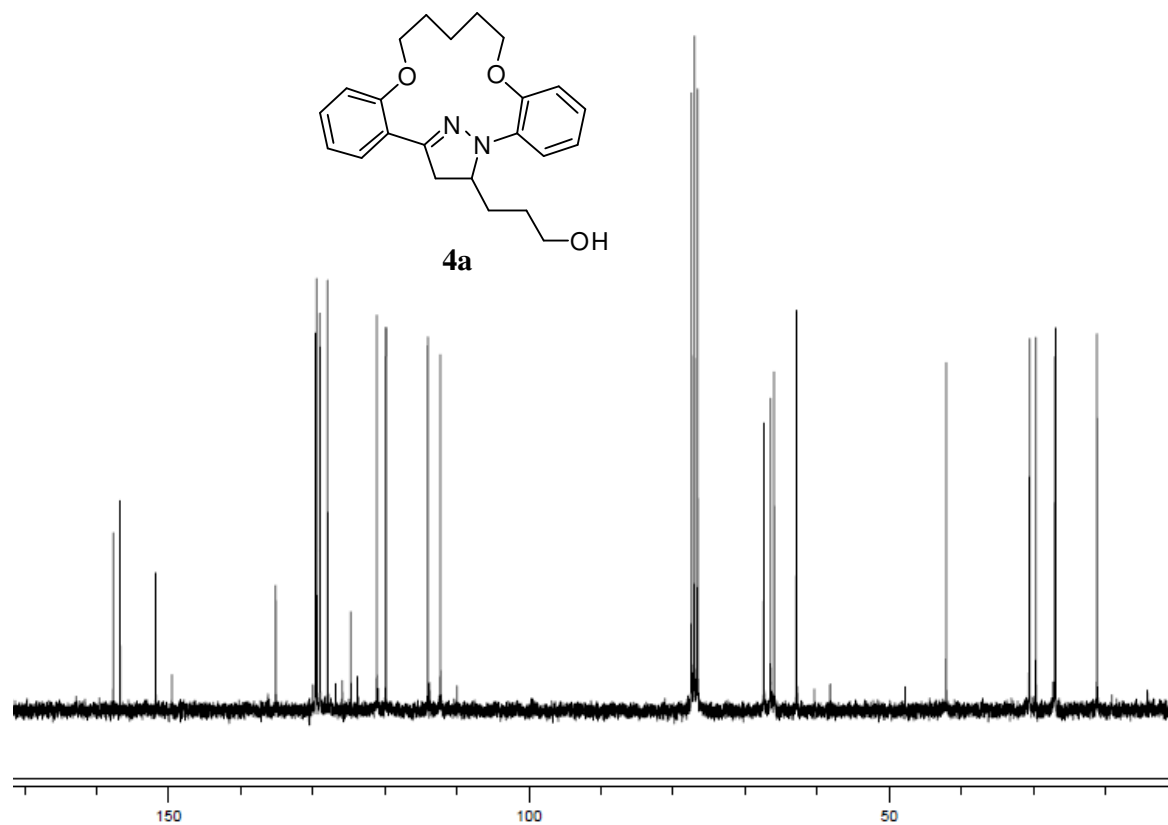

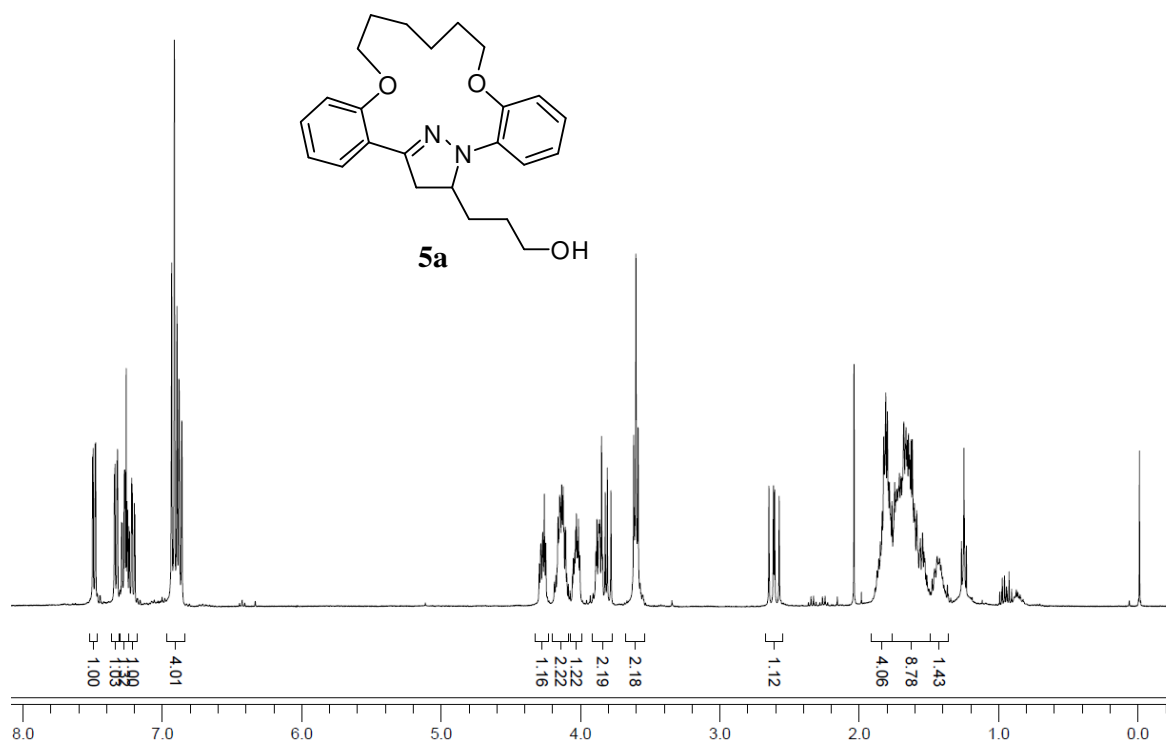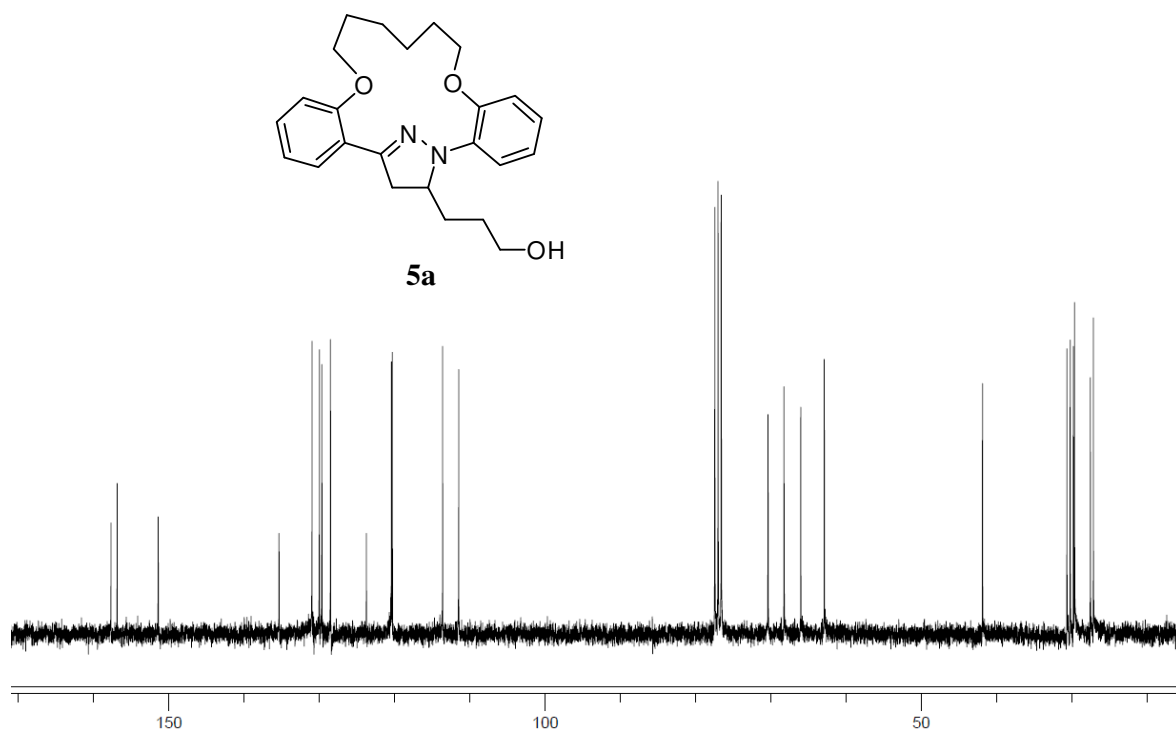

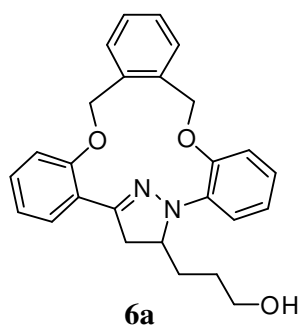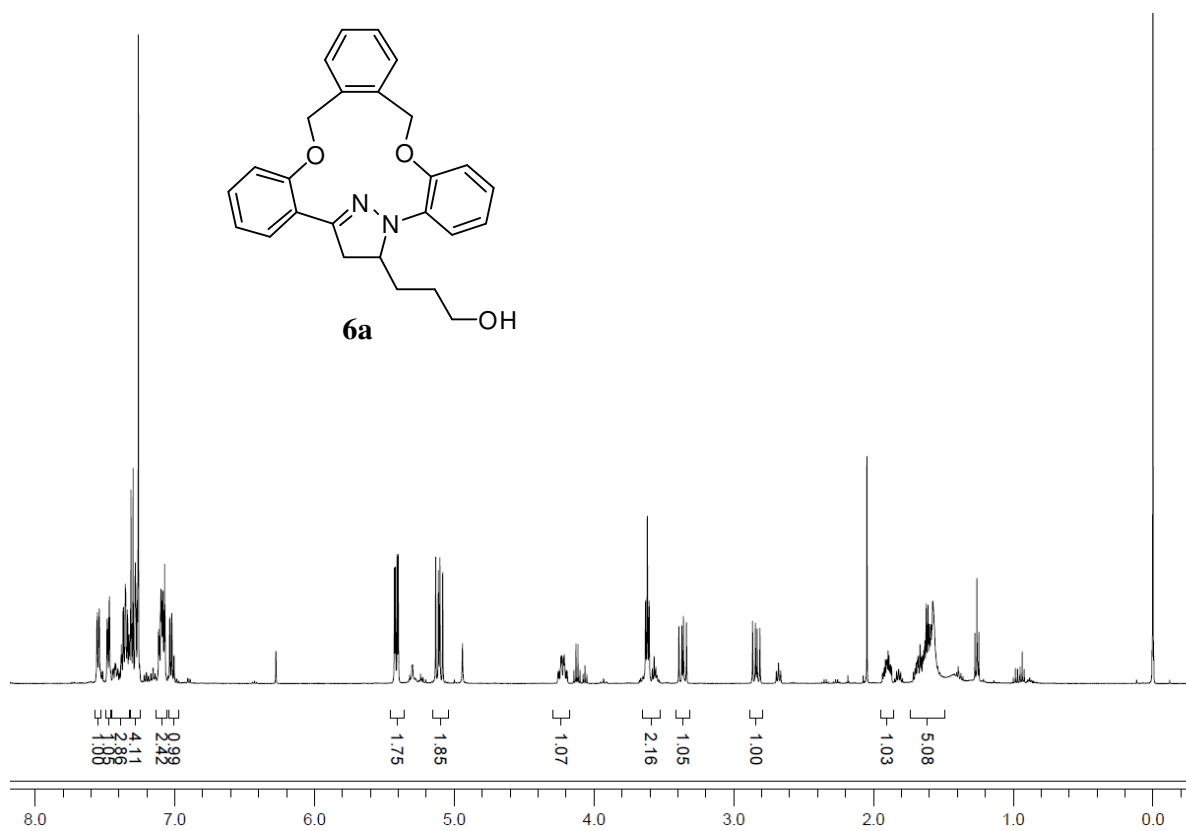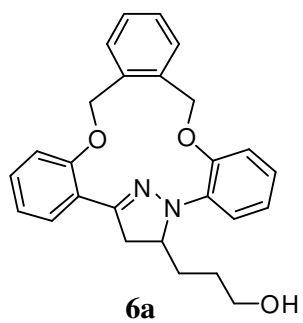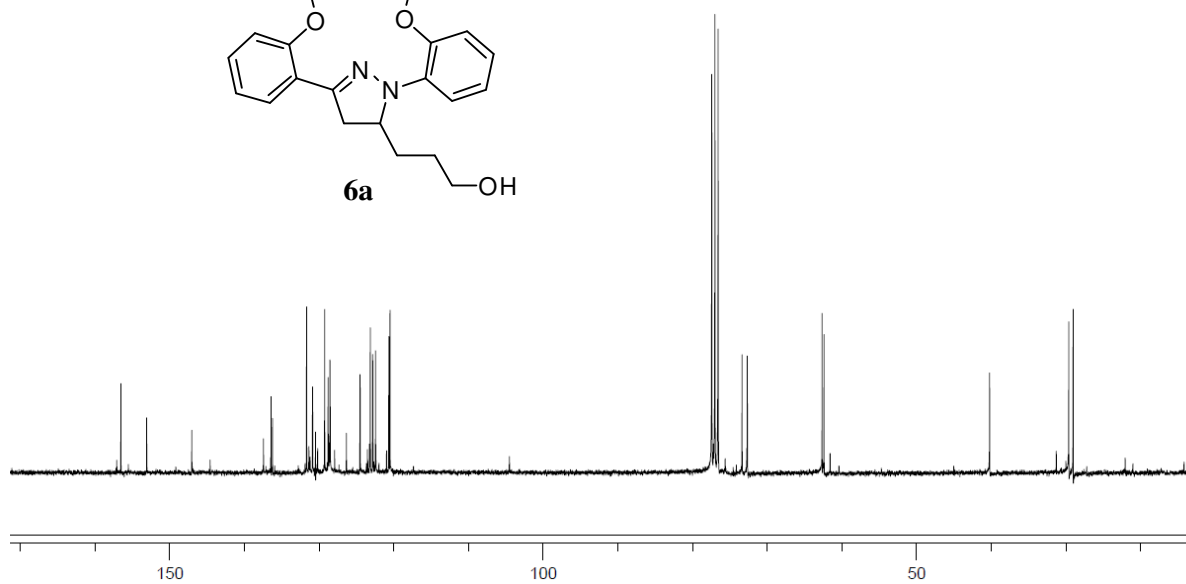

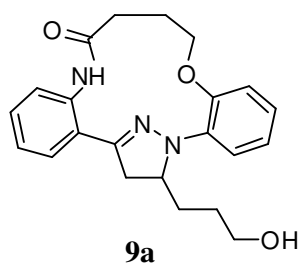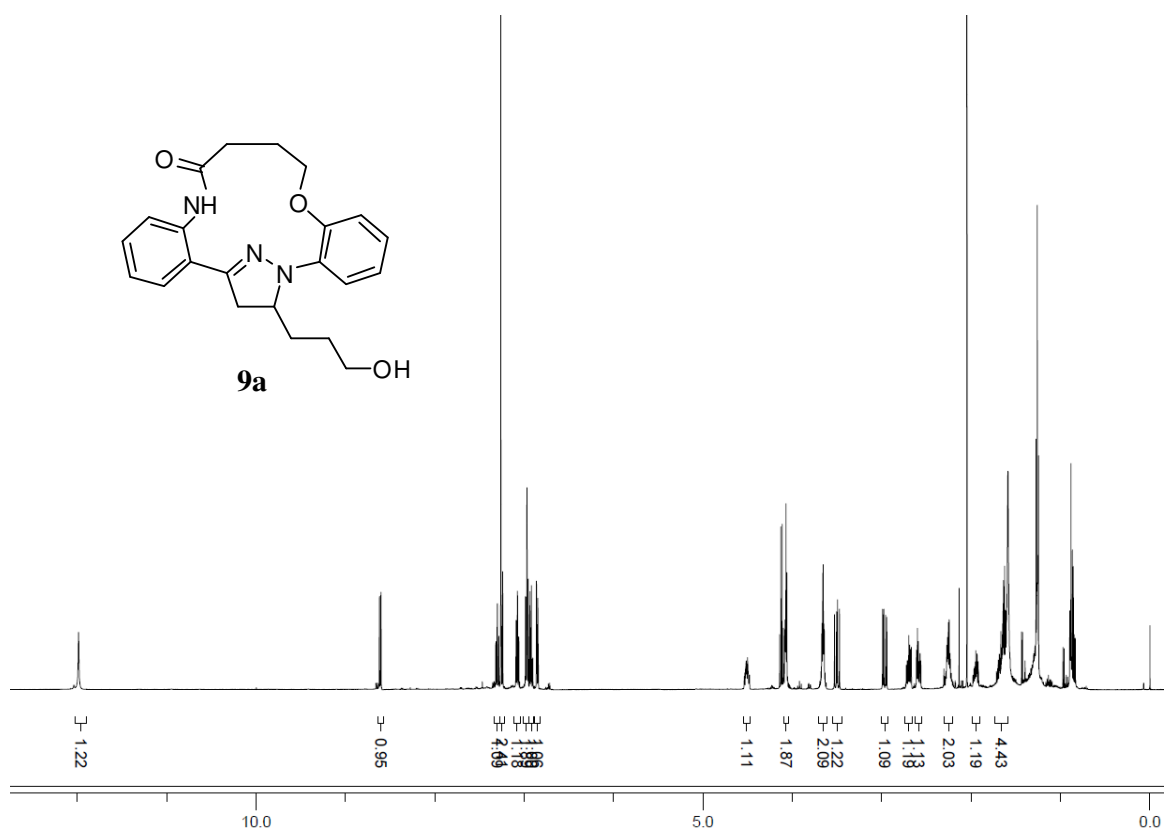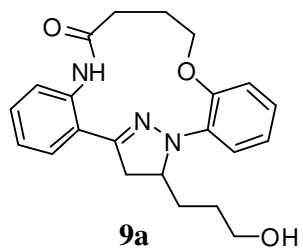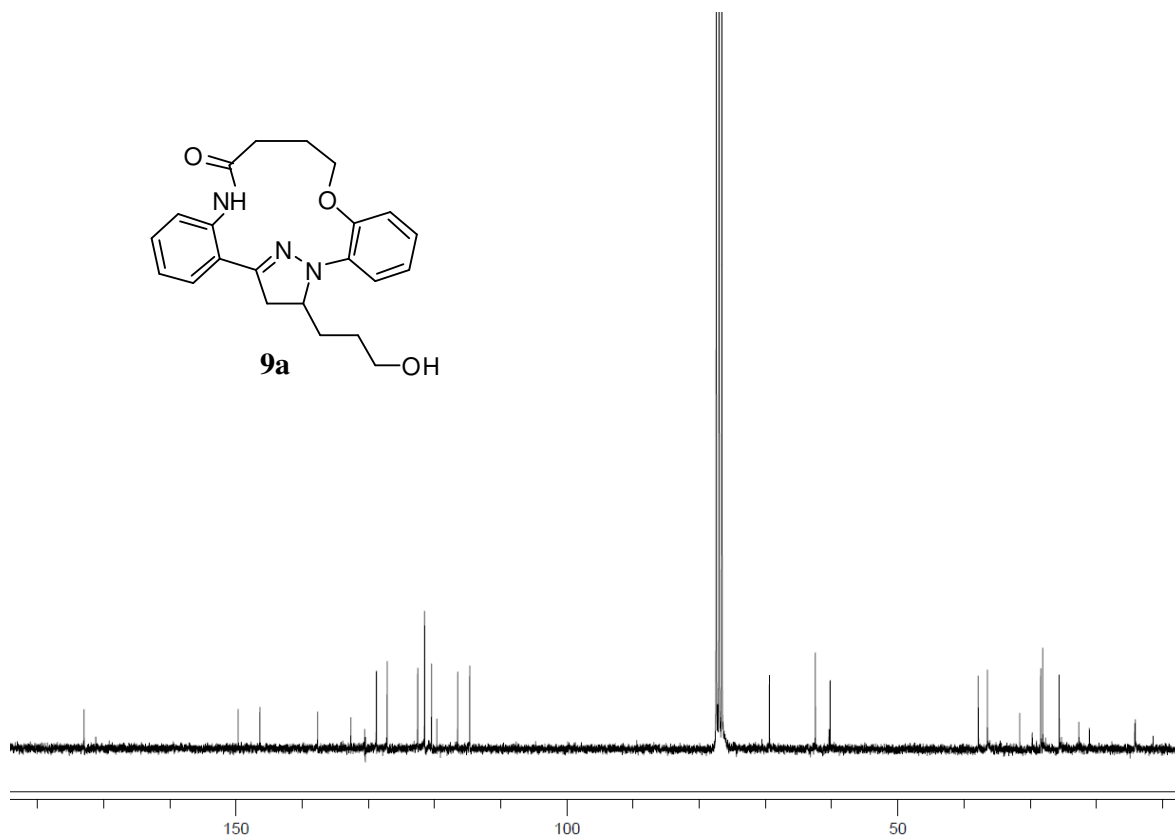

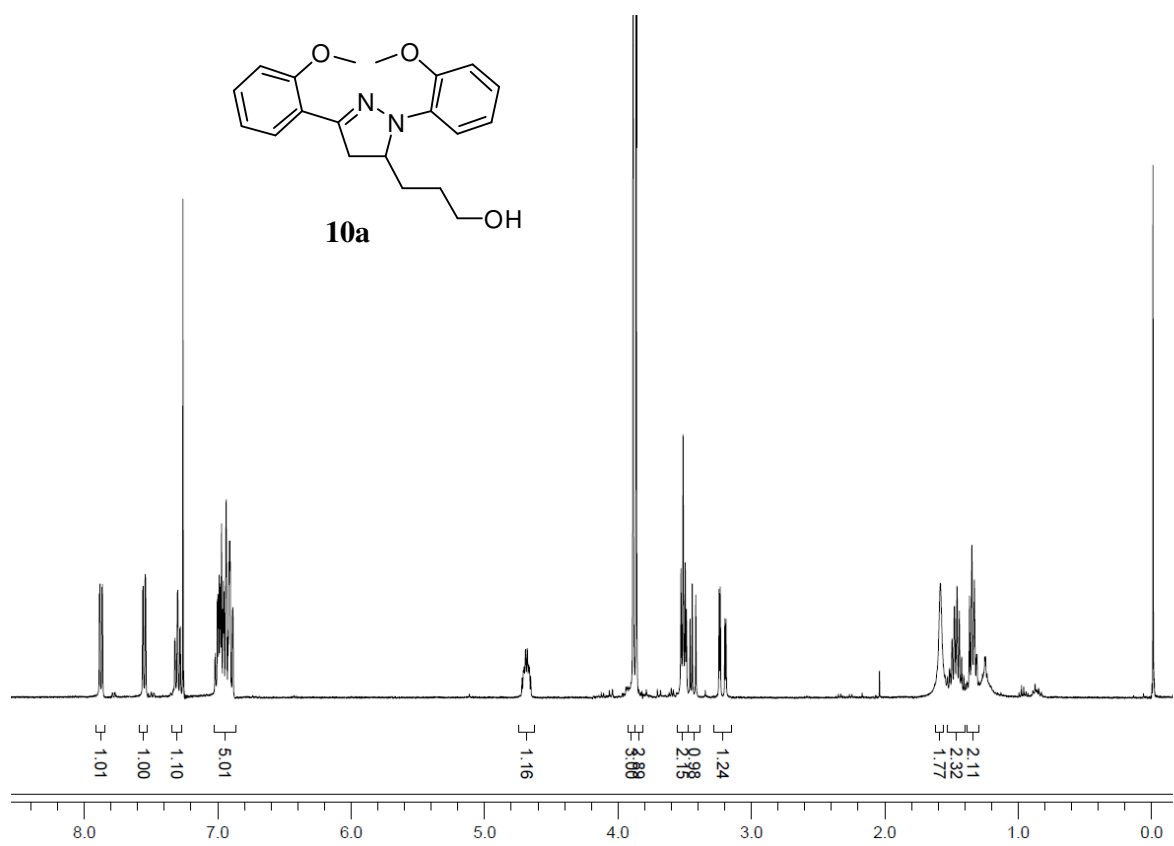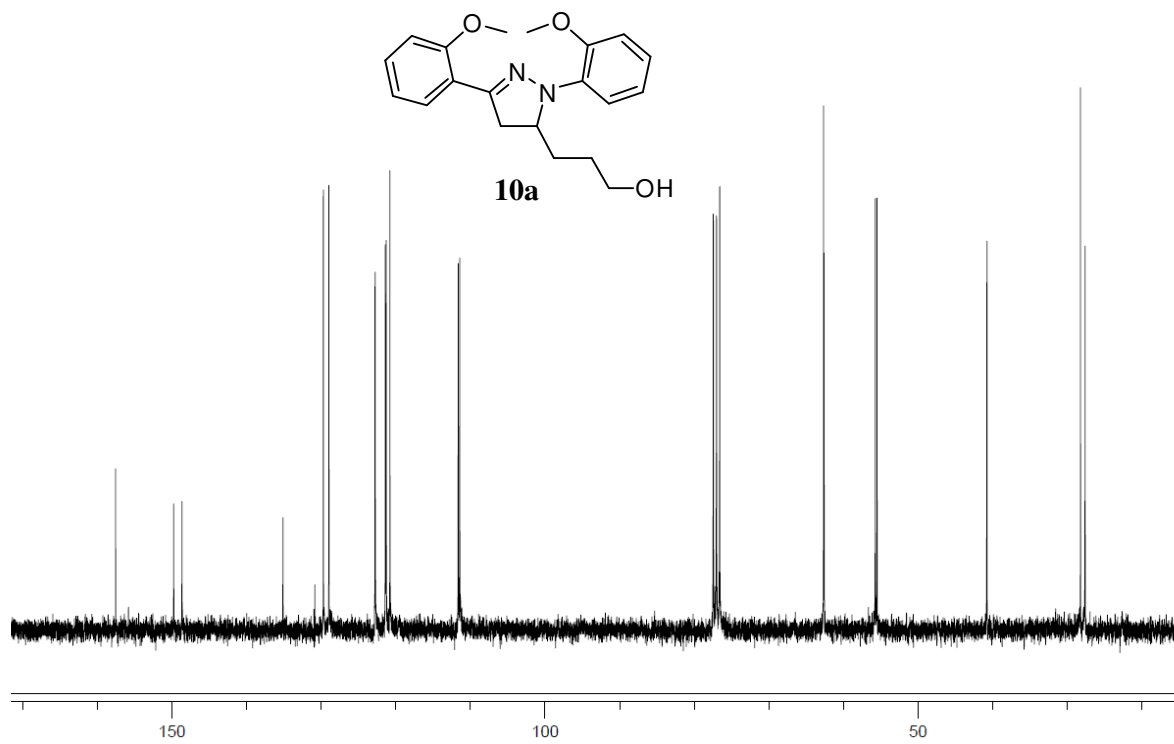



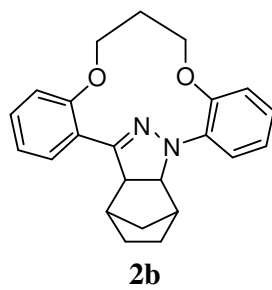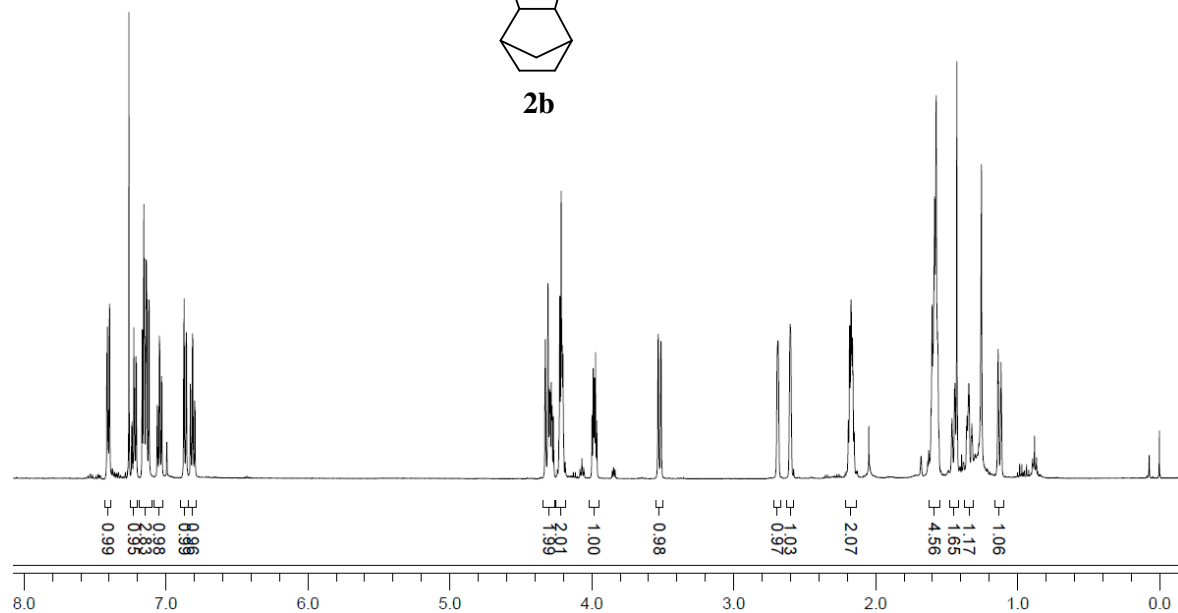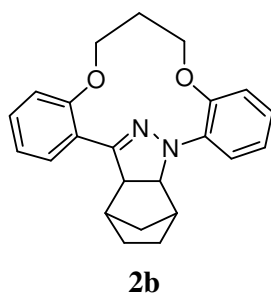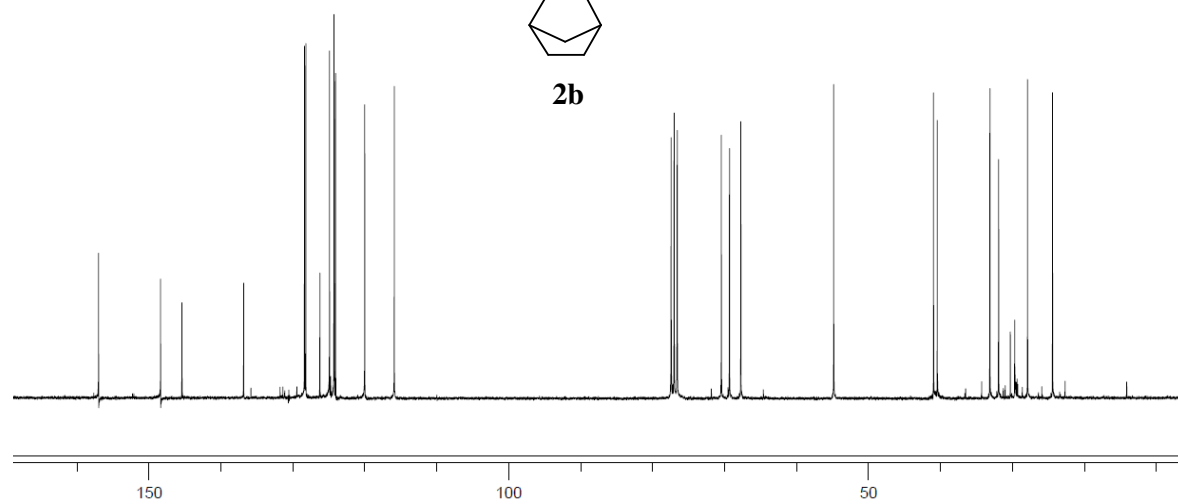

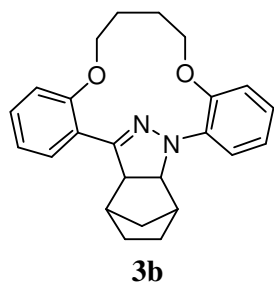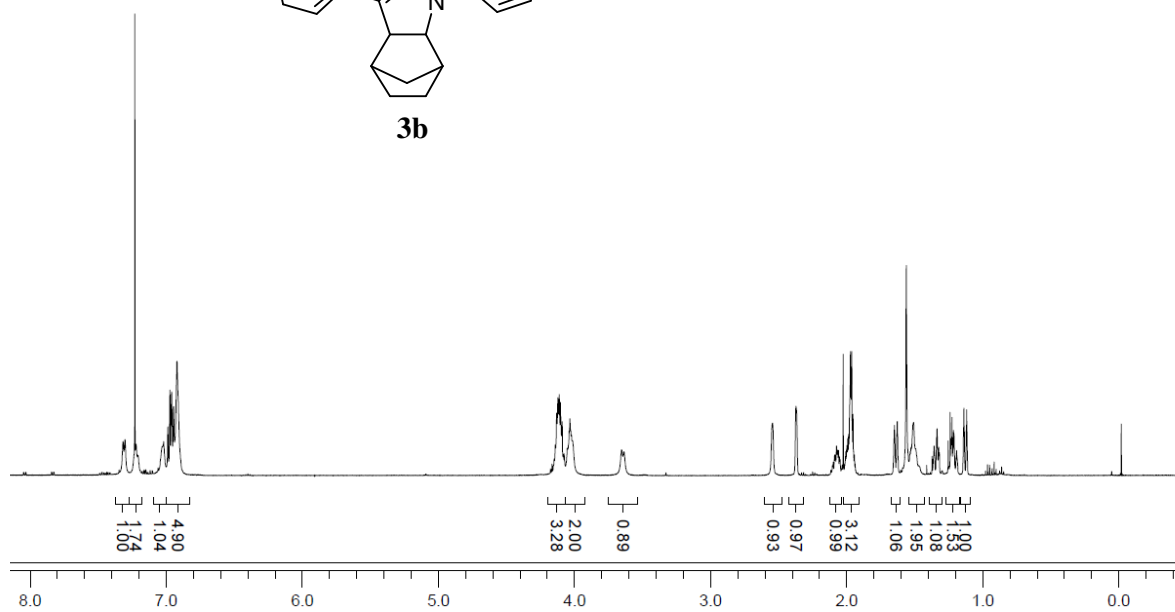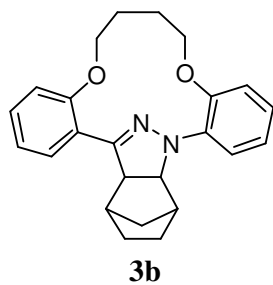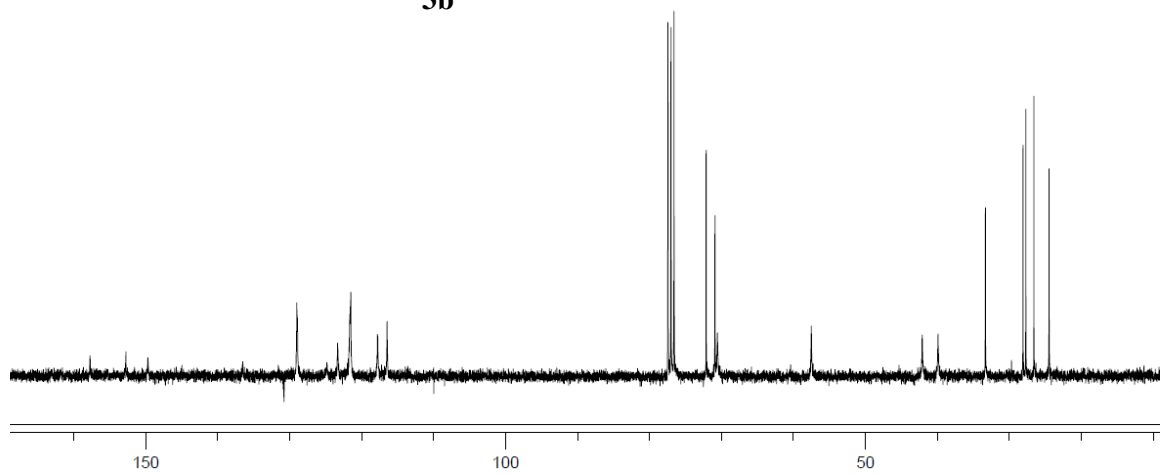

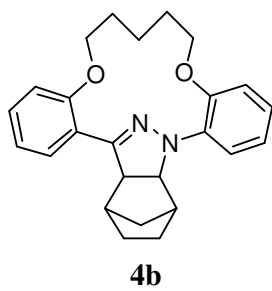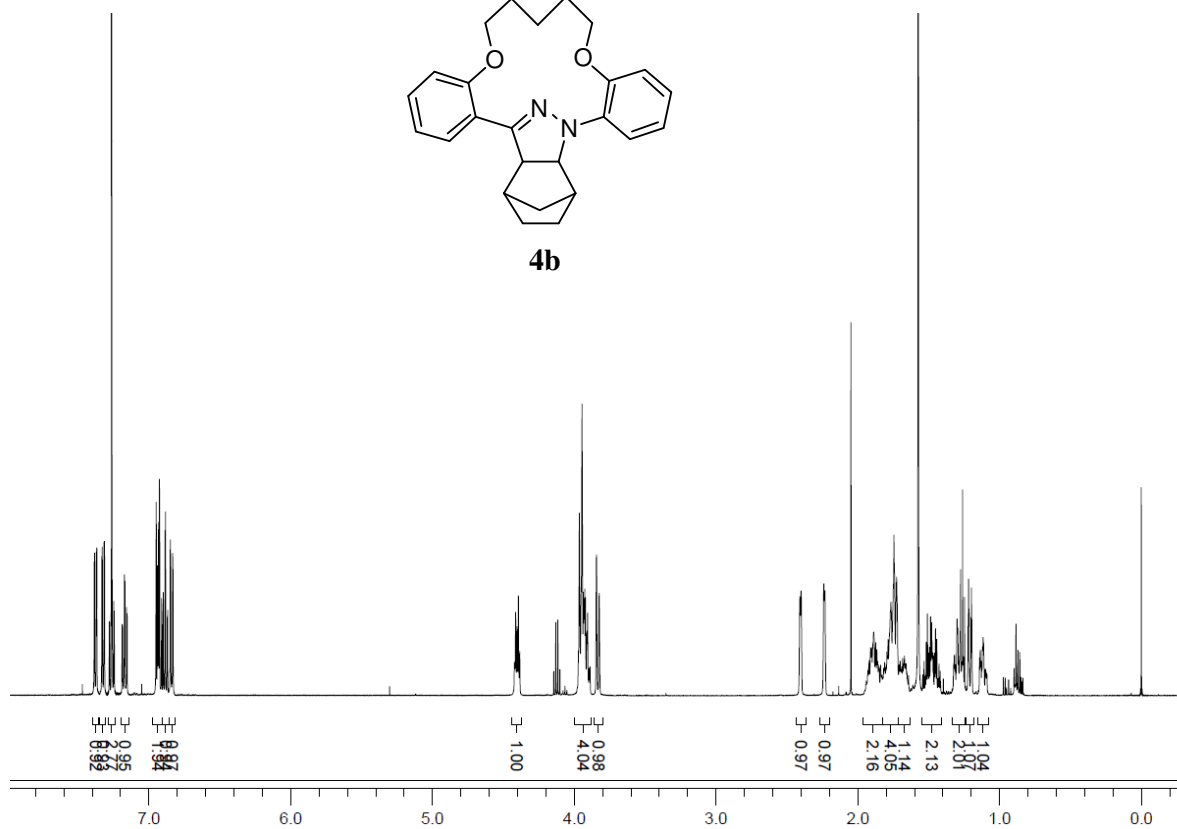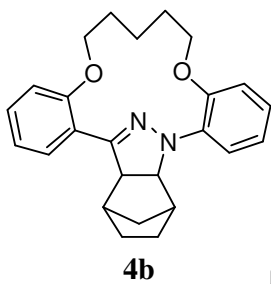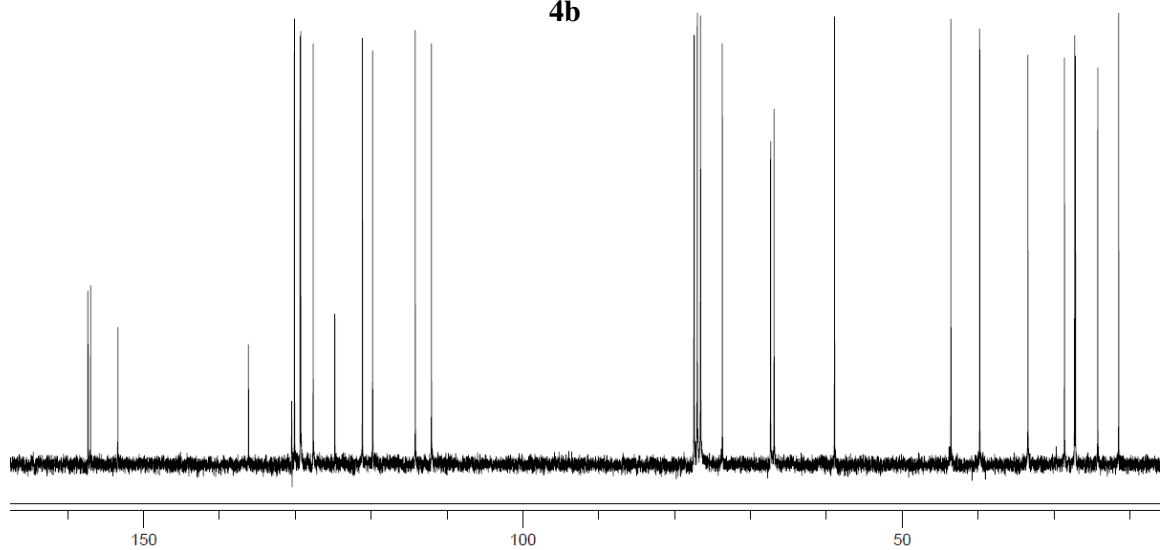

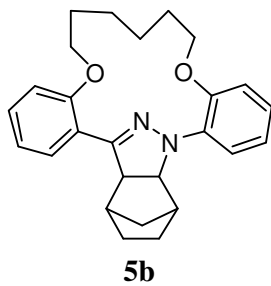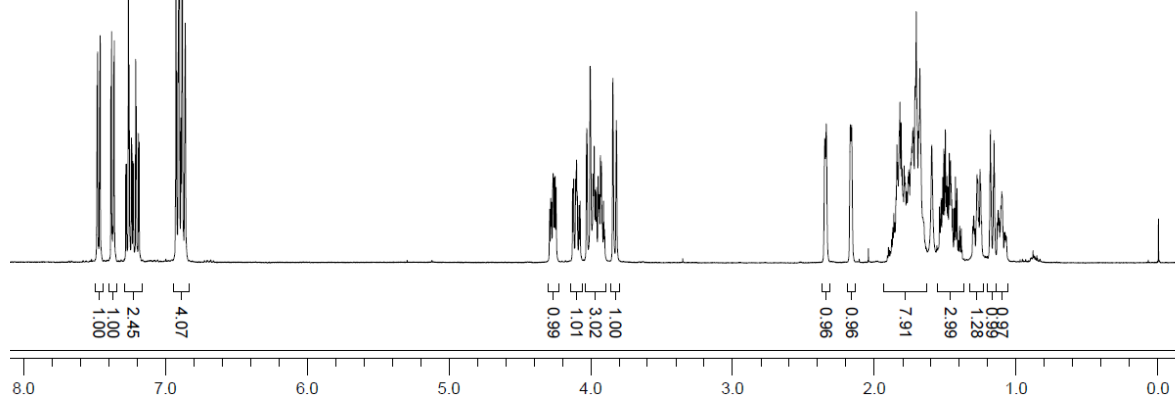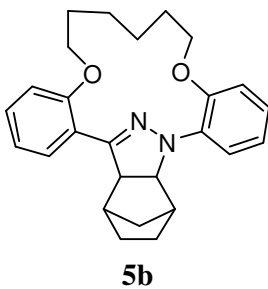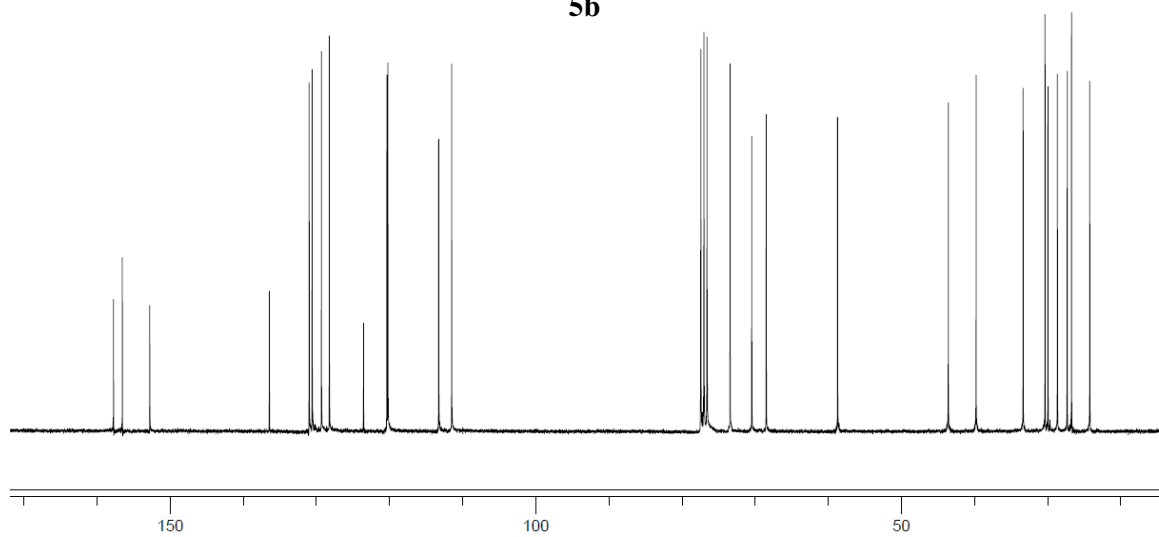

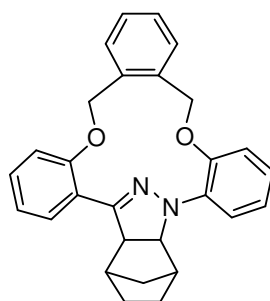

**6b**

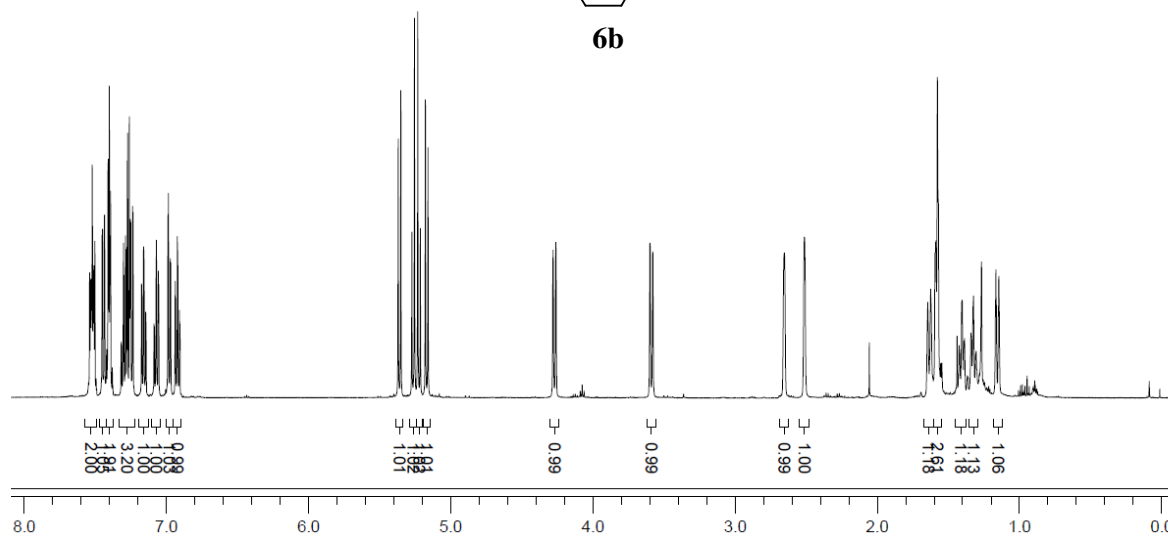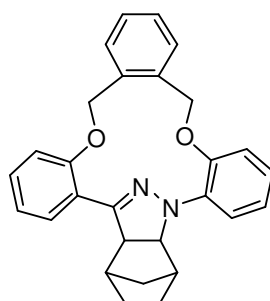

**6b**

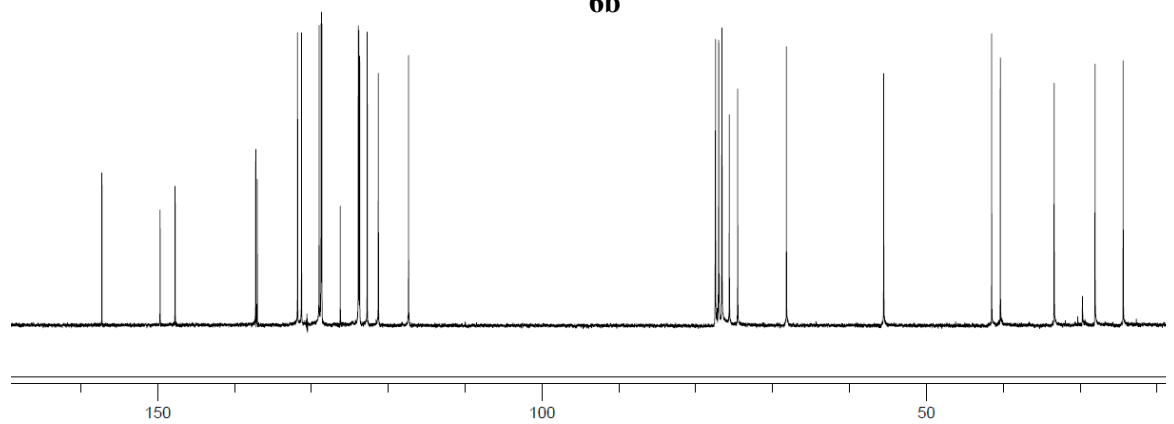

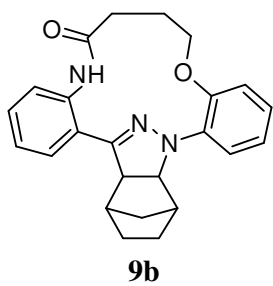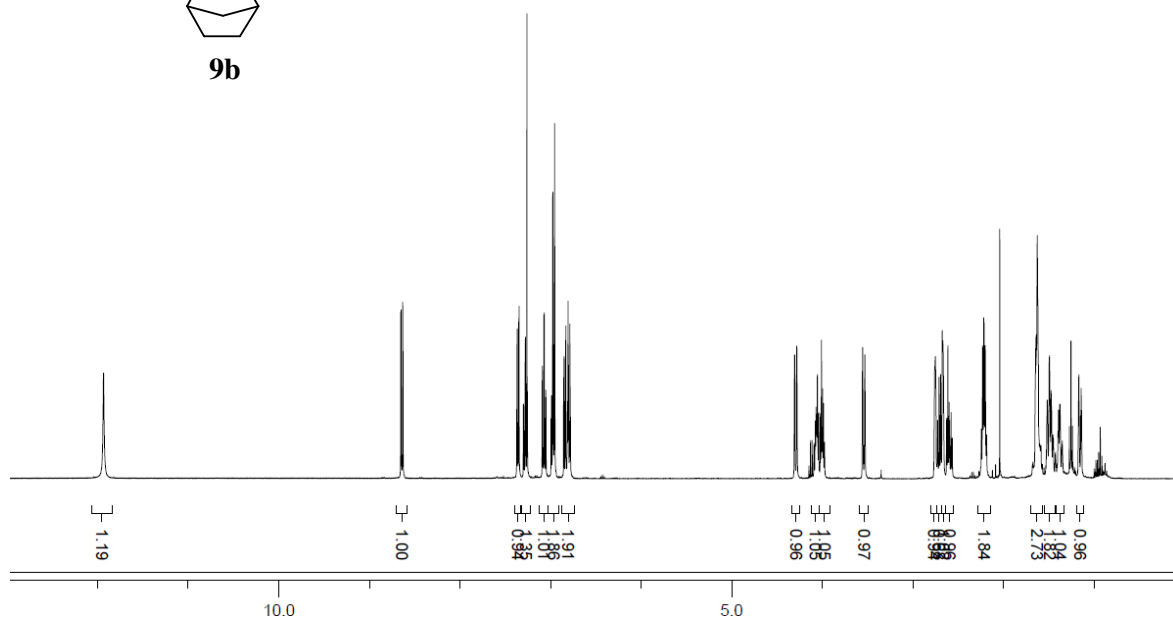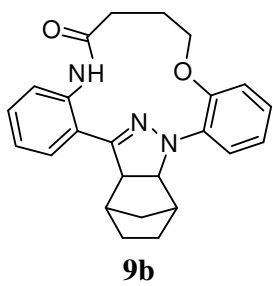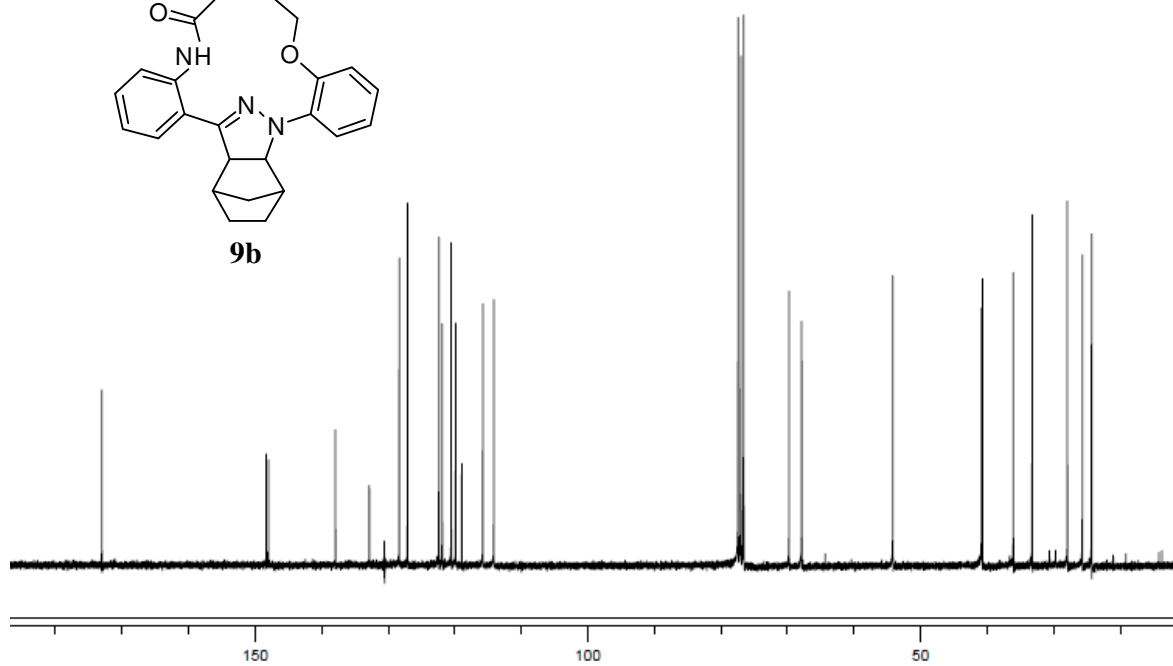

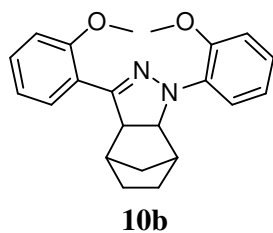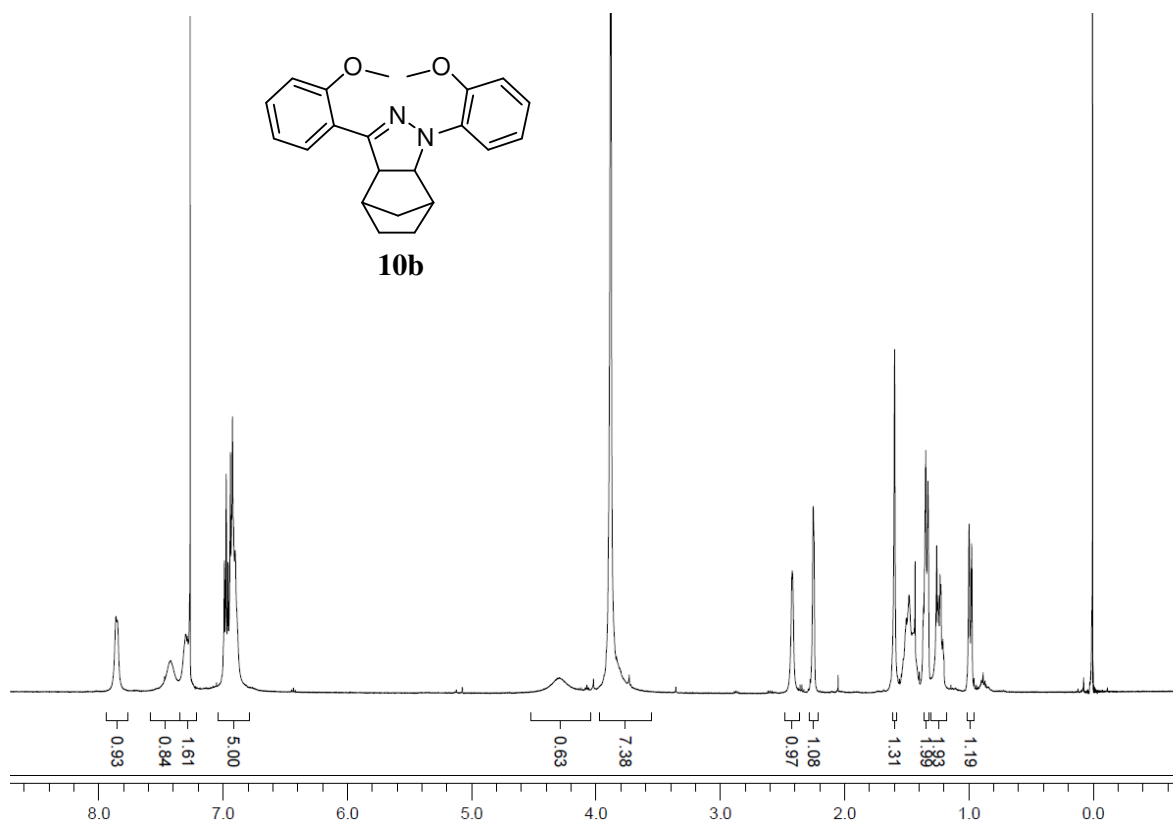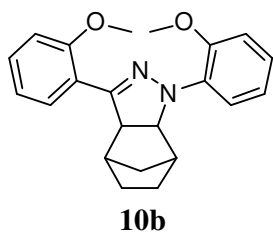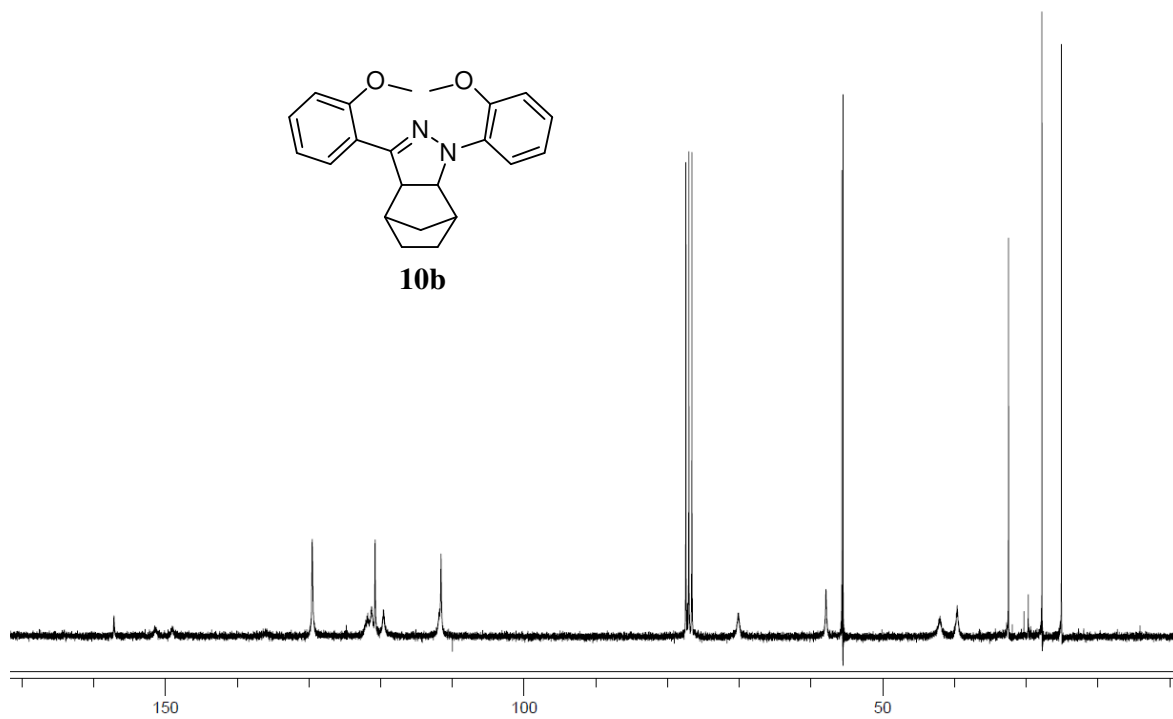

Supplement: NIHMS256454-supplement-2.pdf [file NIHMS256454-supplement-2.pdf]
